# Supplementary material
Source: publisher site journal article supplement (https://www.dovepress.com/article/455355)
Supplement: Supplementary file 1 [file get_supplementary_file.php]

Supplementary Material


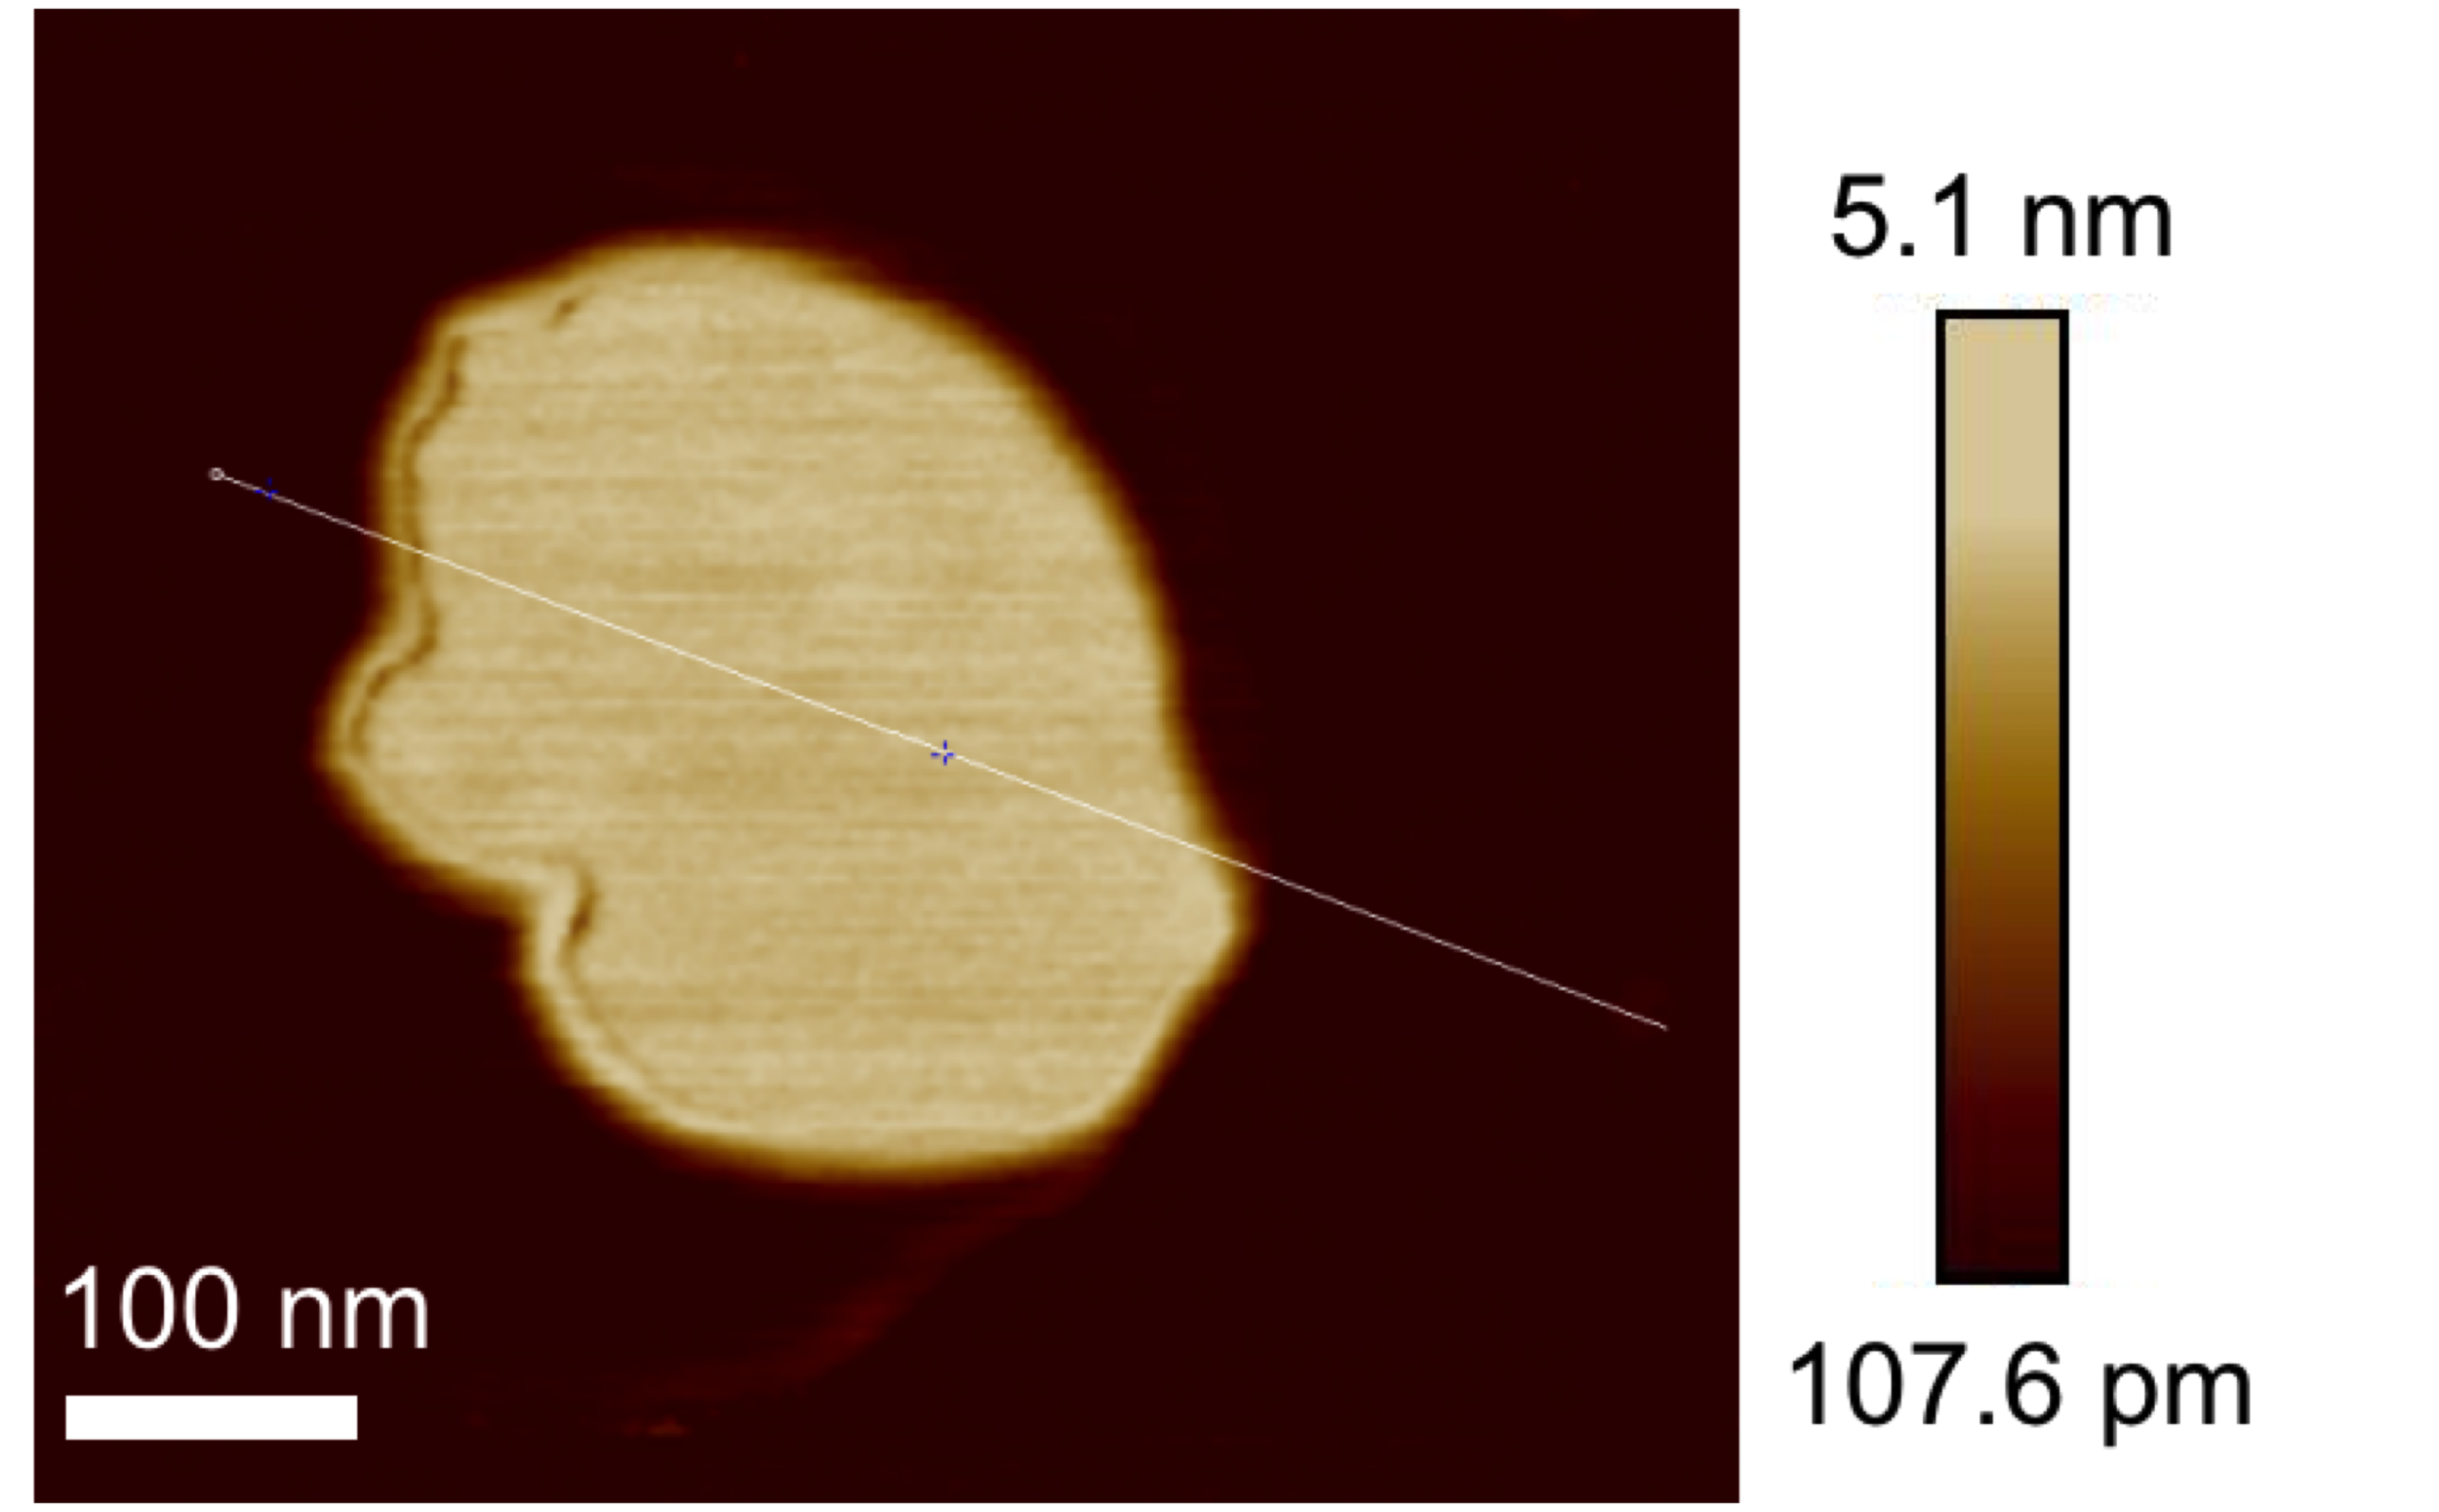


Figure S1 AFM image of GDY.


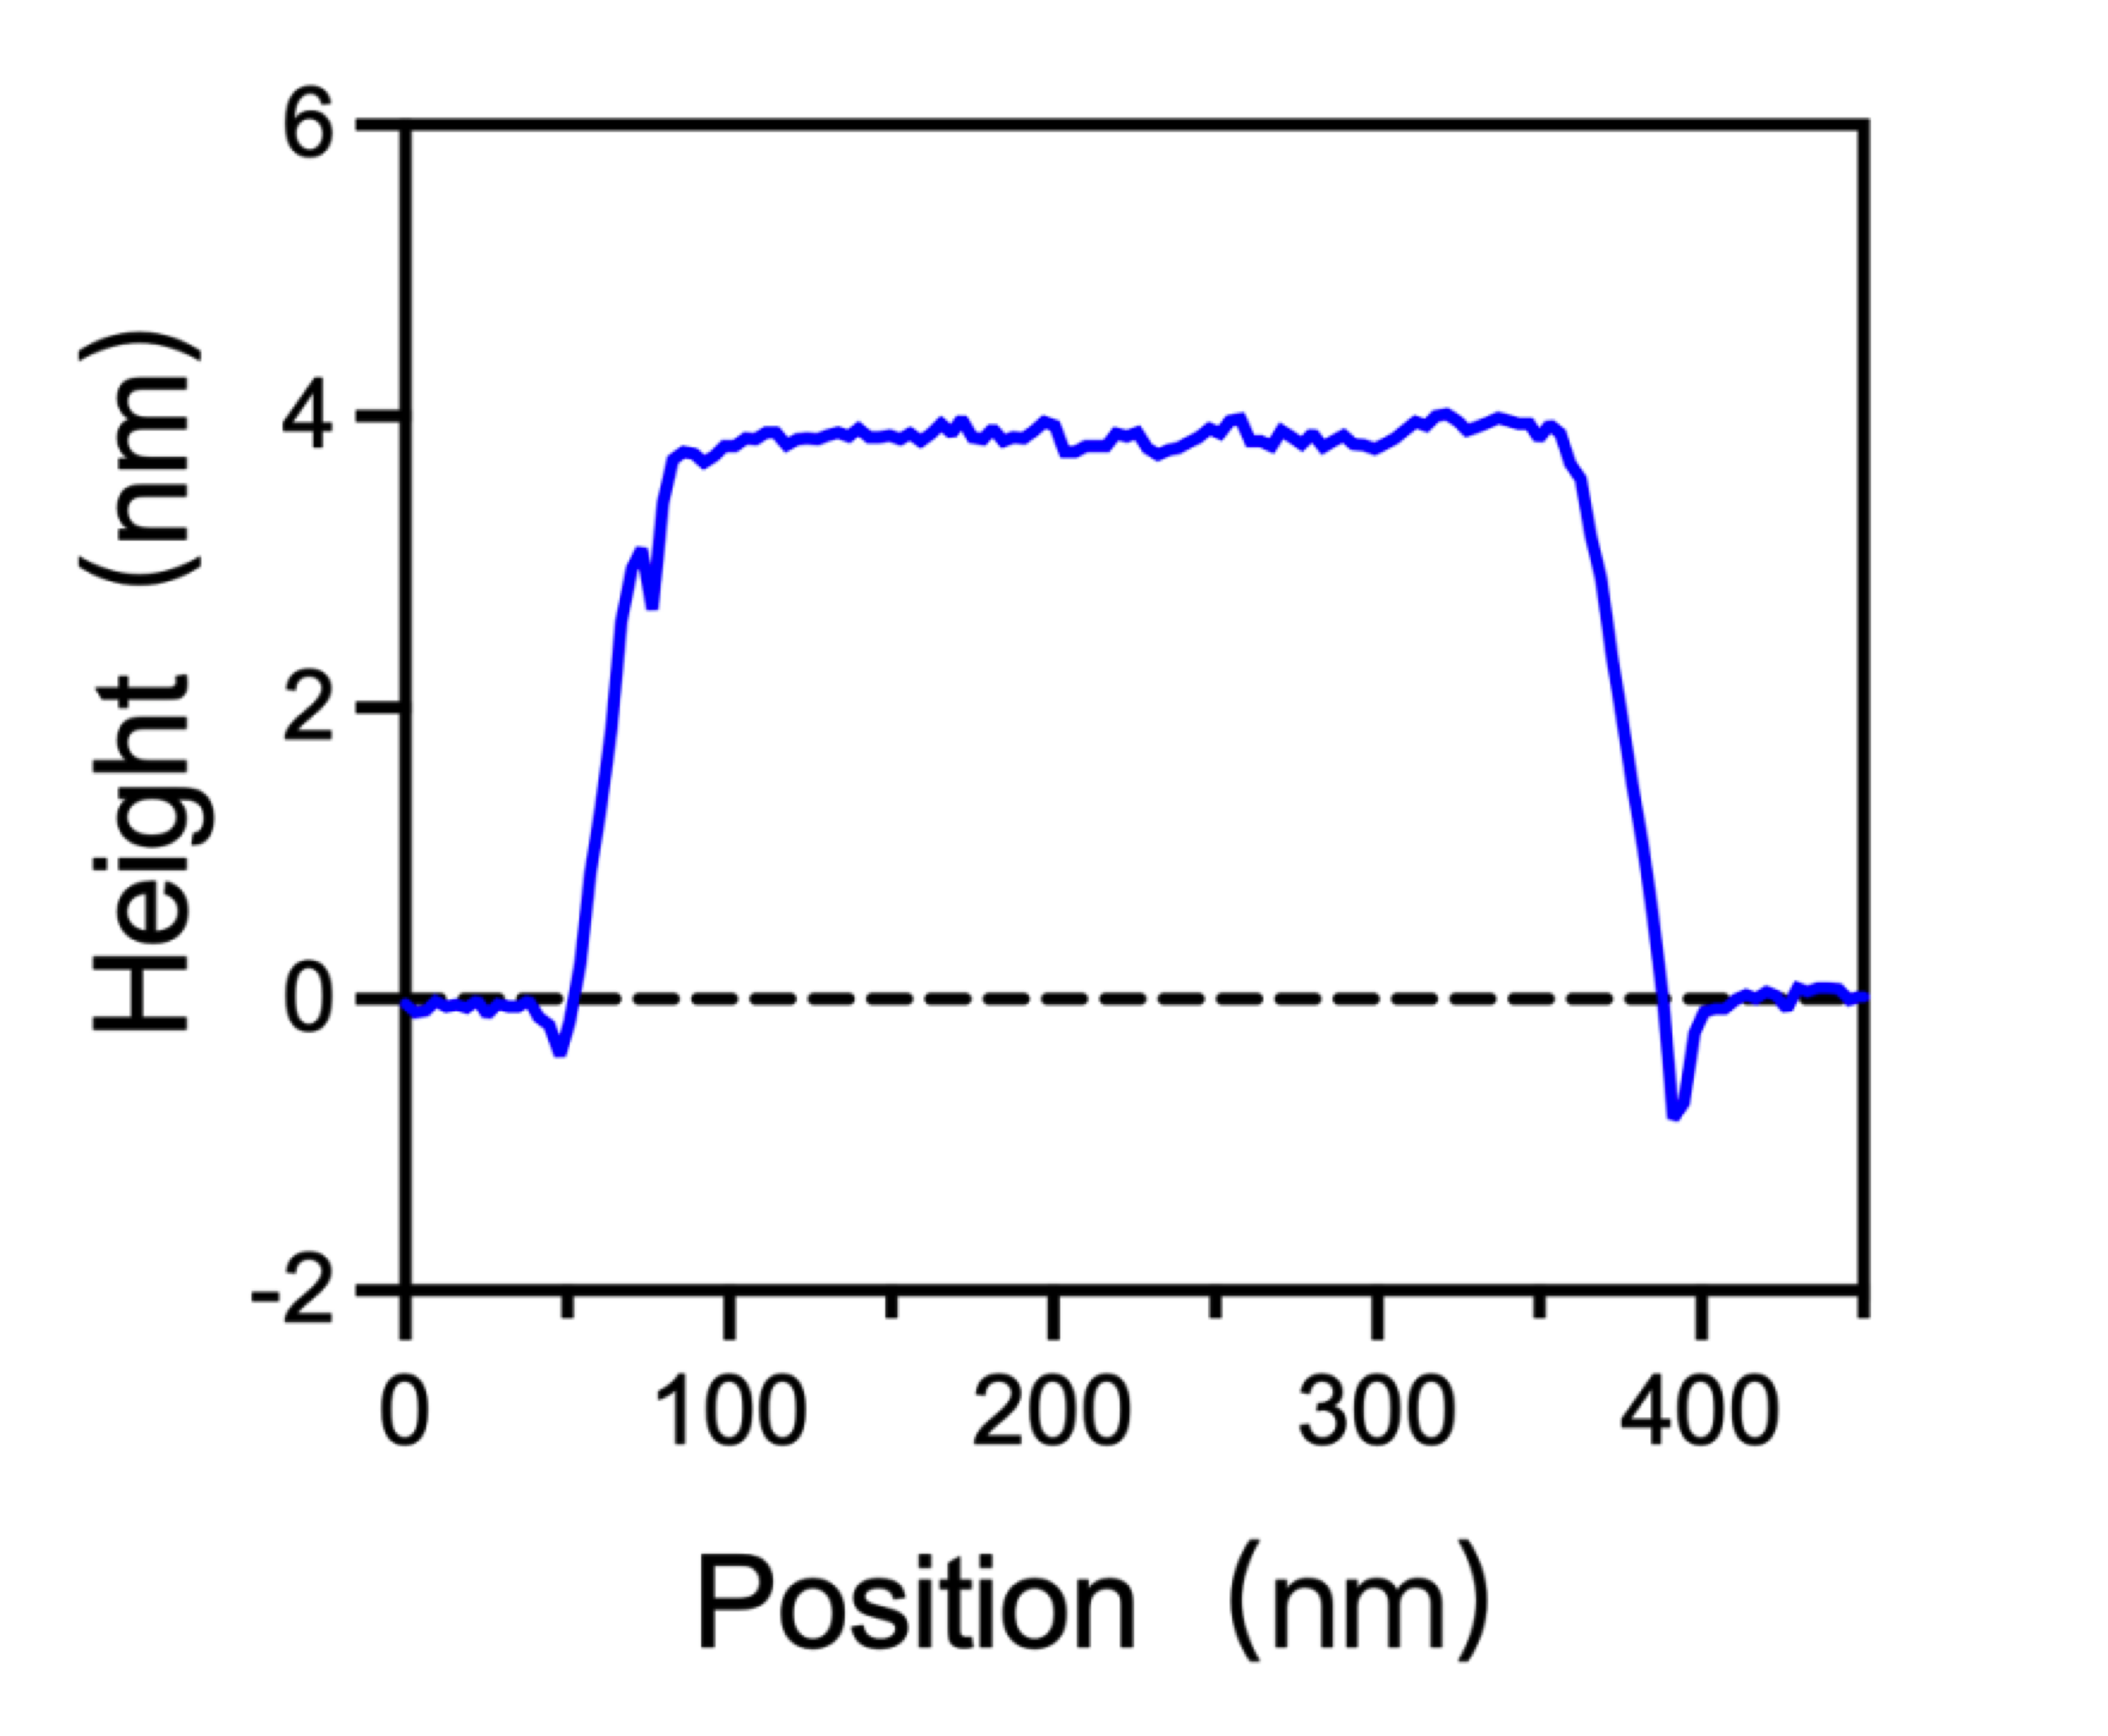


Figure S2 The average height of GDY detected by AFM.


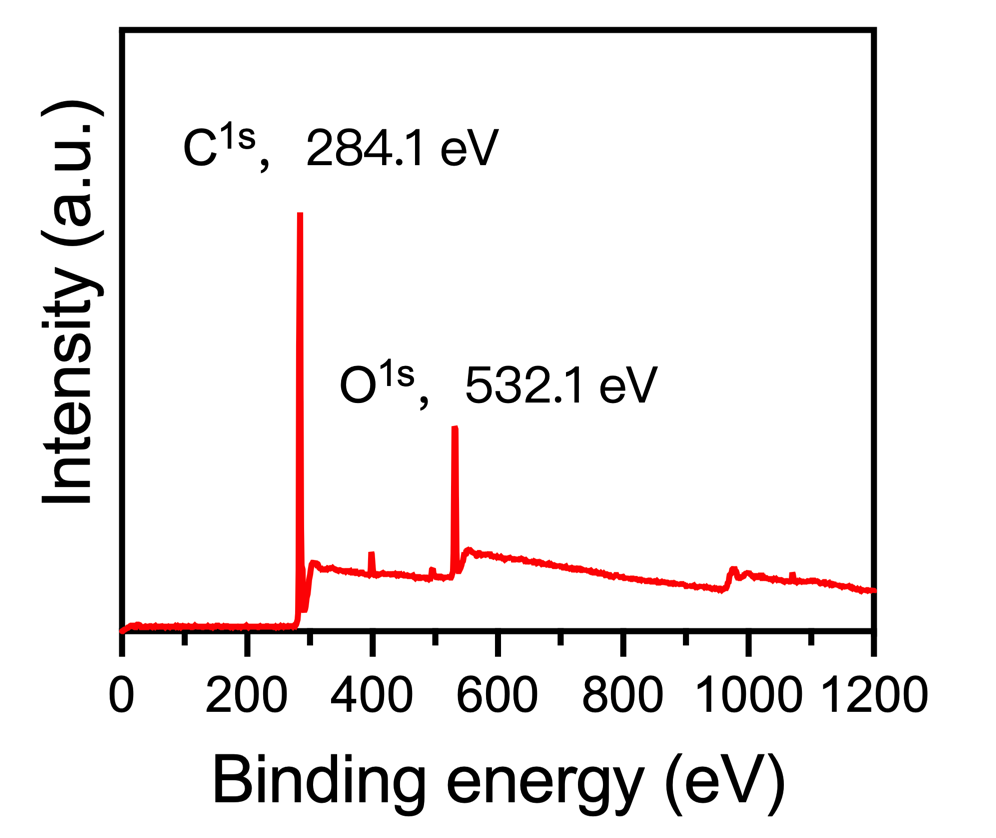


Figure S3 XPS spectrum of GDY.


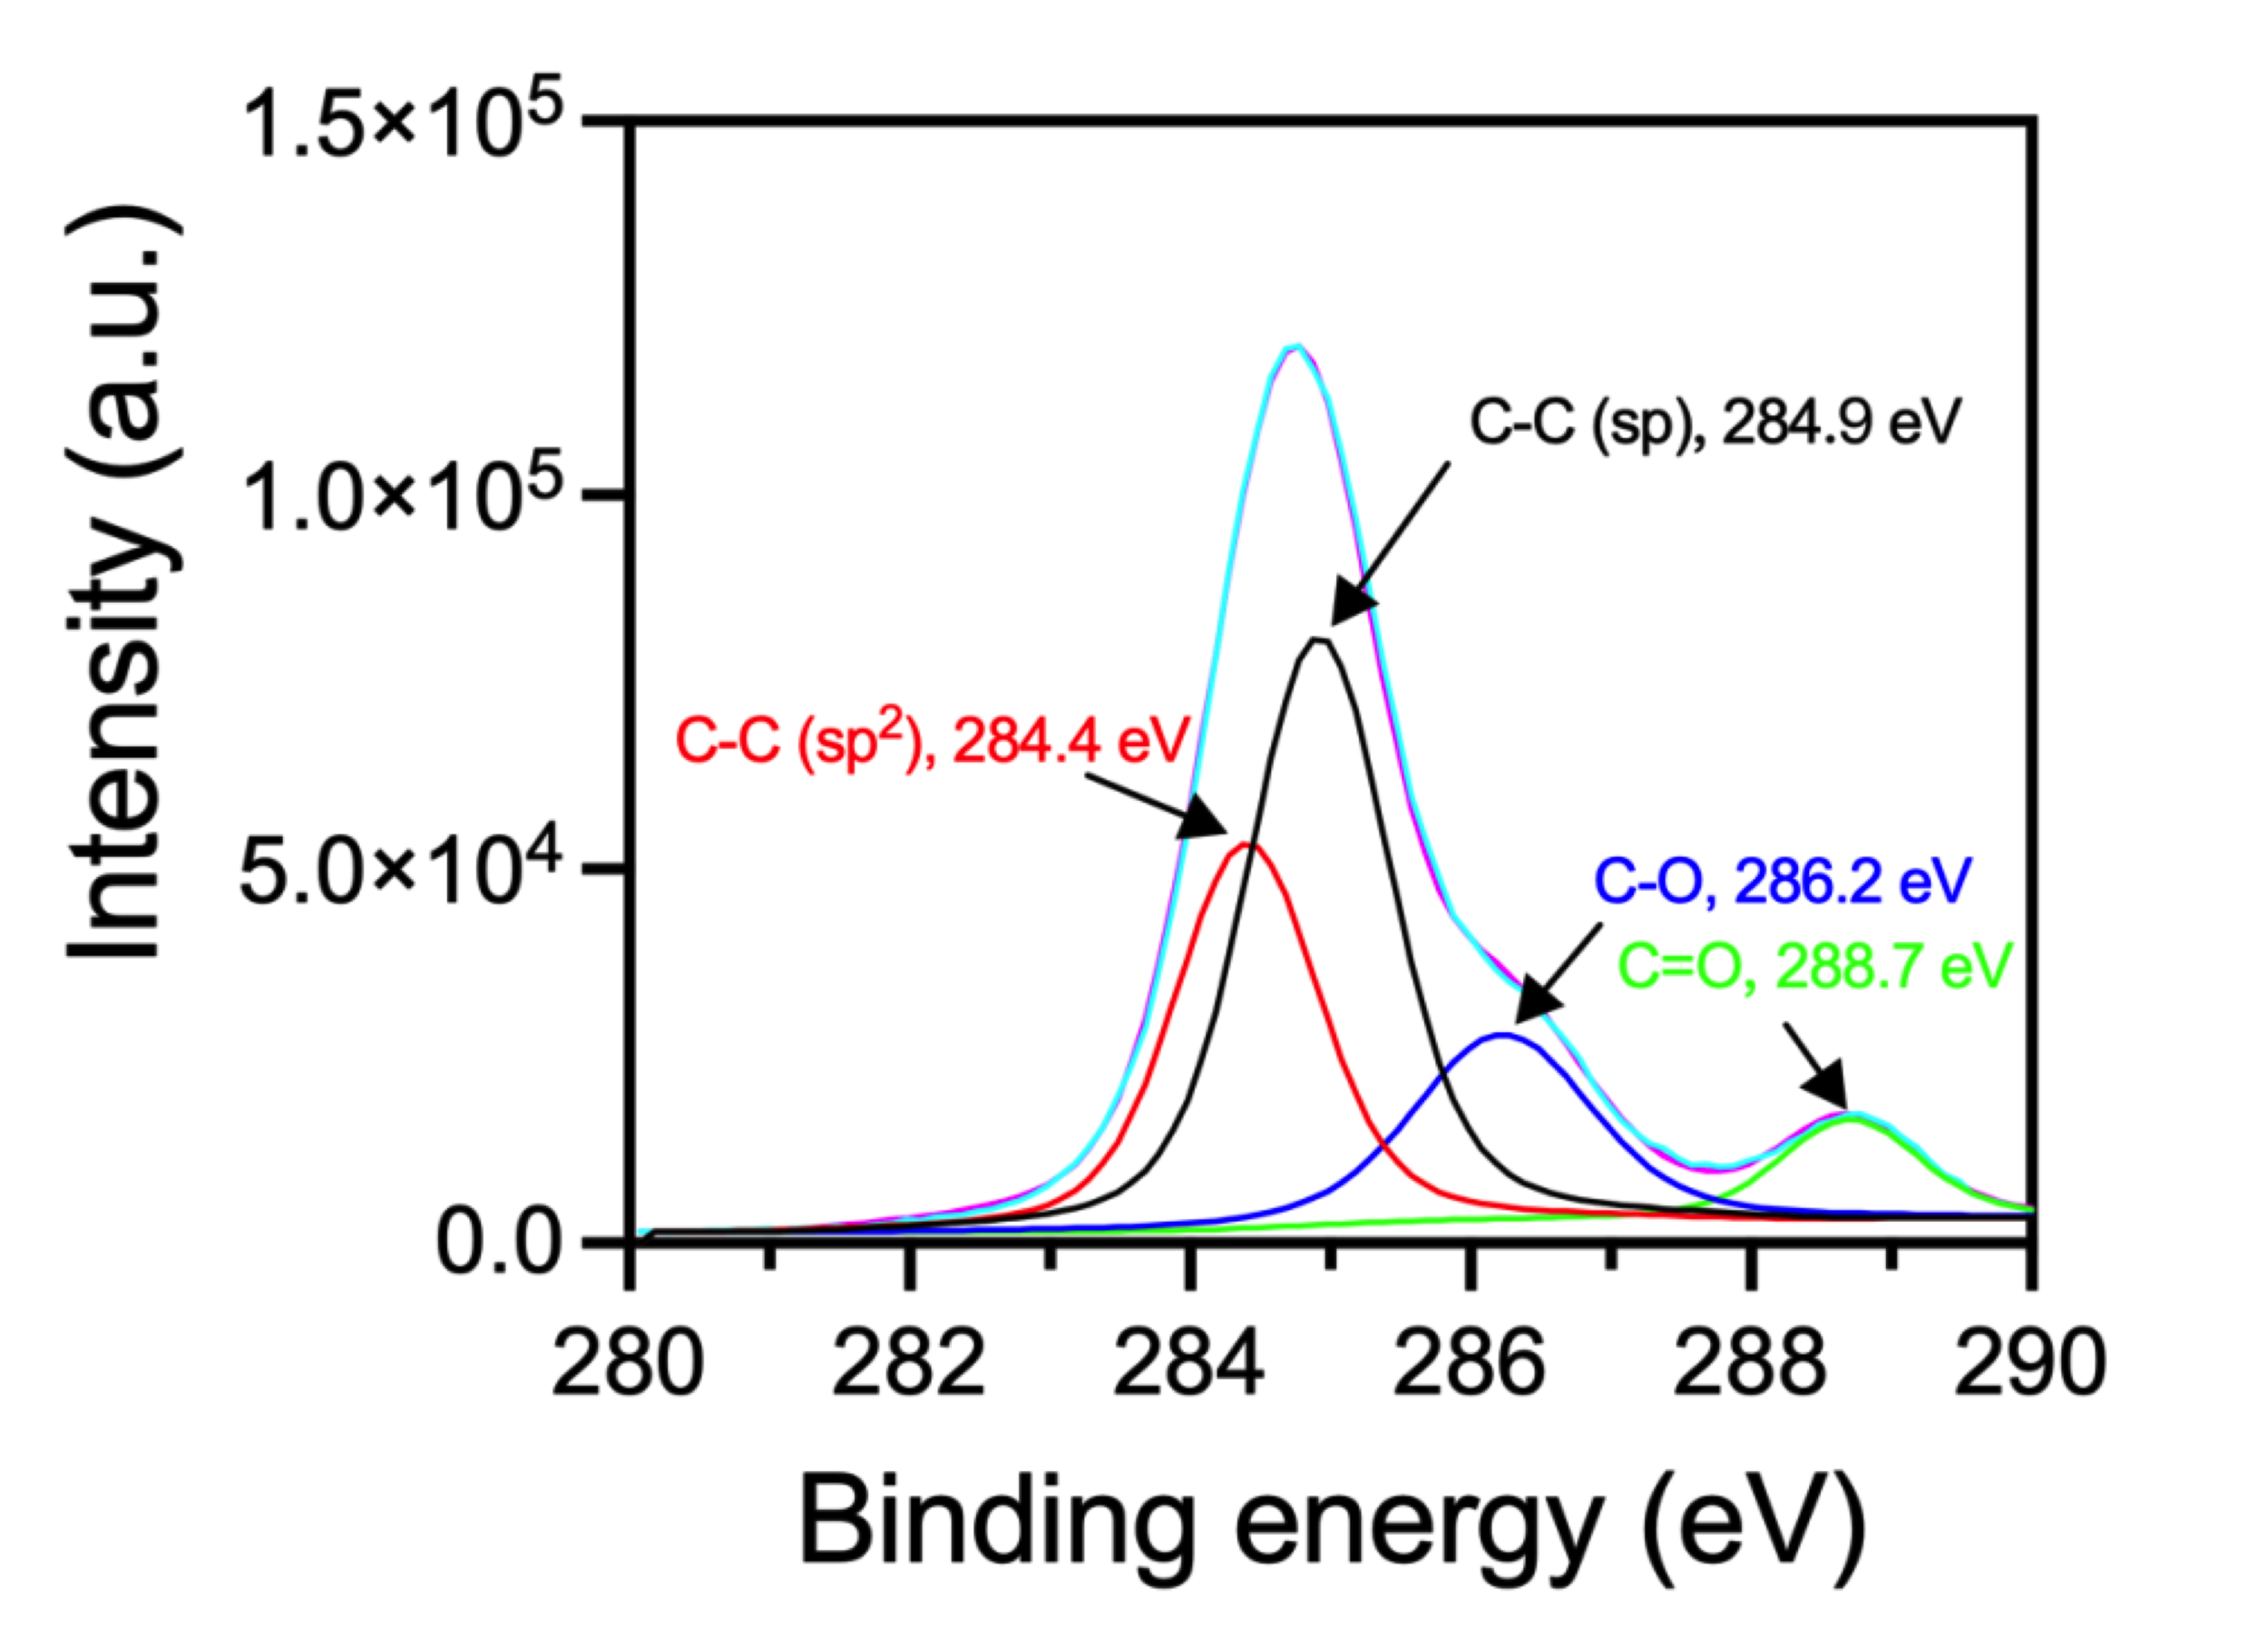


Figure S4 Binding energy of C 1s orbital of GDY.


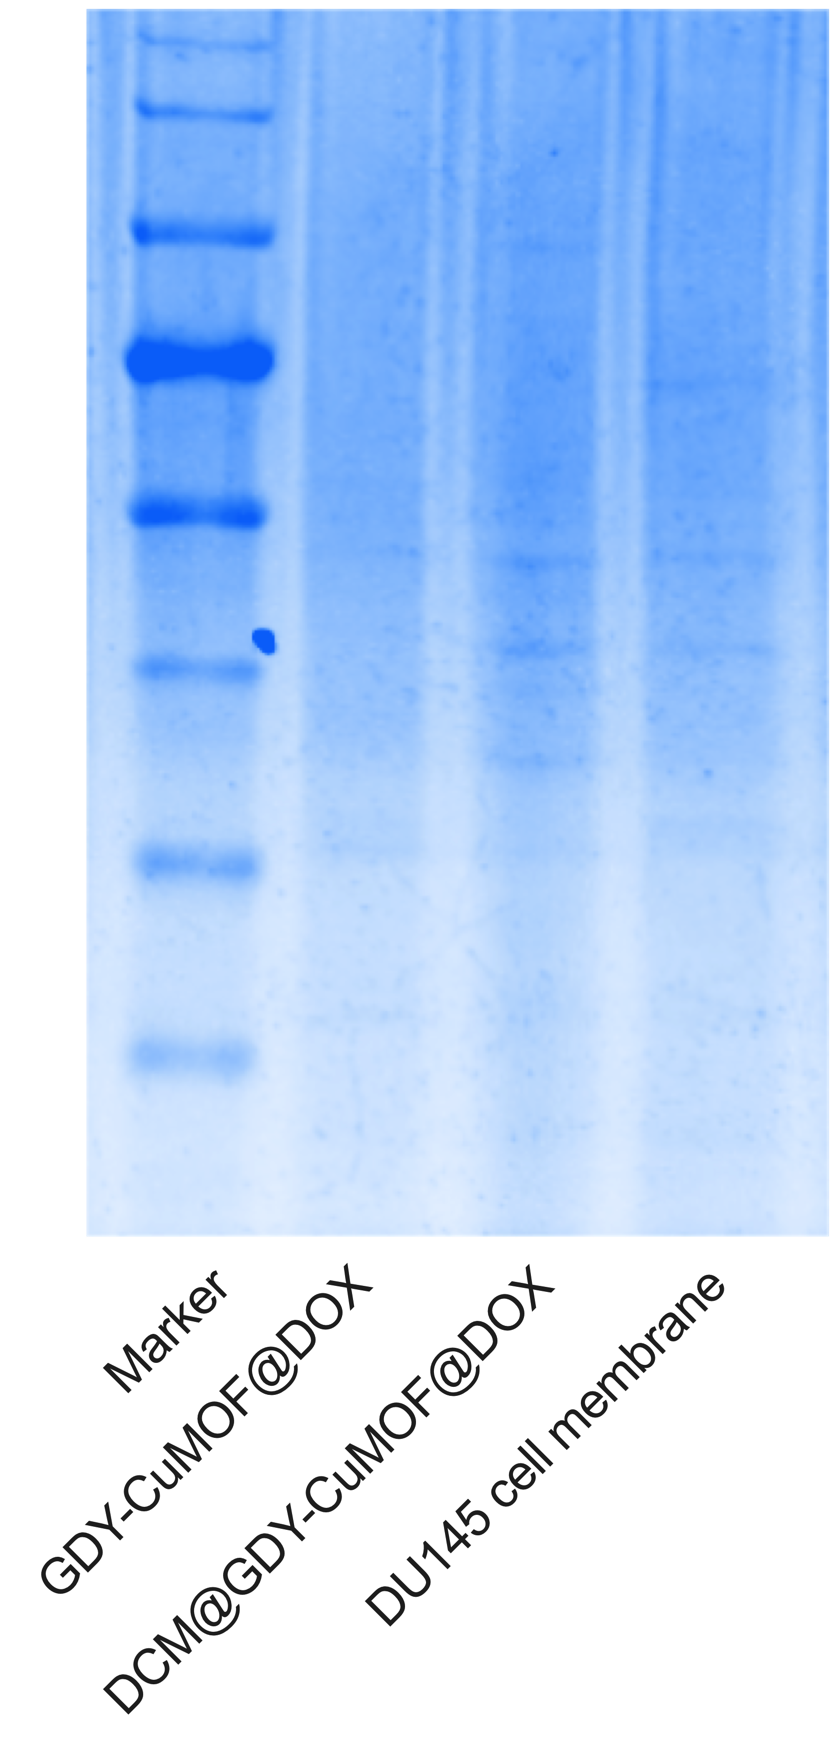


Figure S5 The protein analysis of GDY-CuMOF@DOX, DCM@GDY-CuMOF@DOX, and DU145 cell membrane by SDS-PAGE.


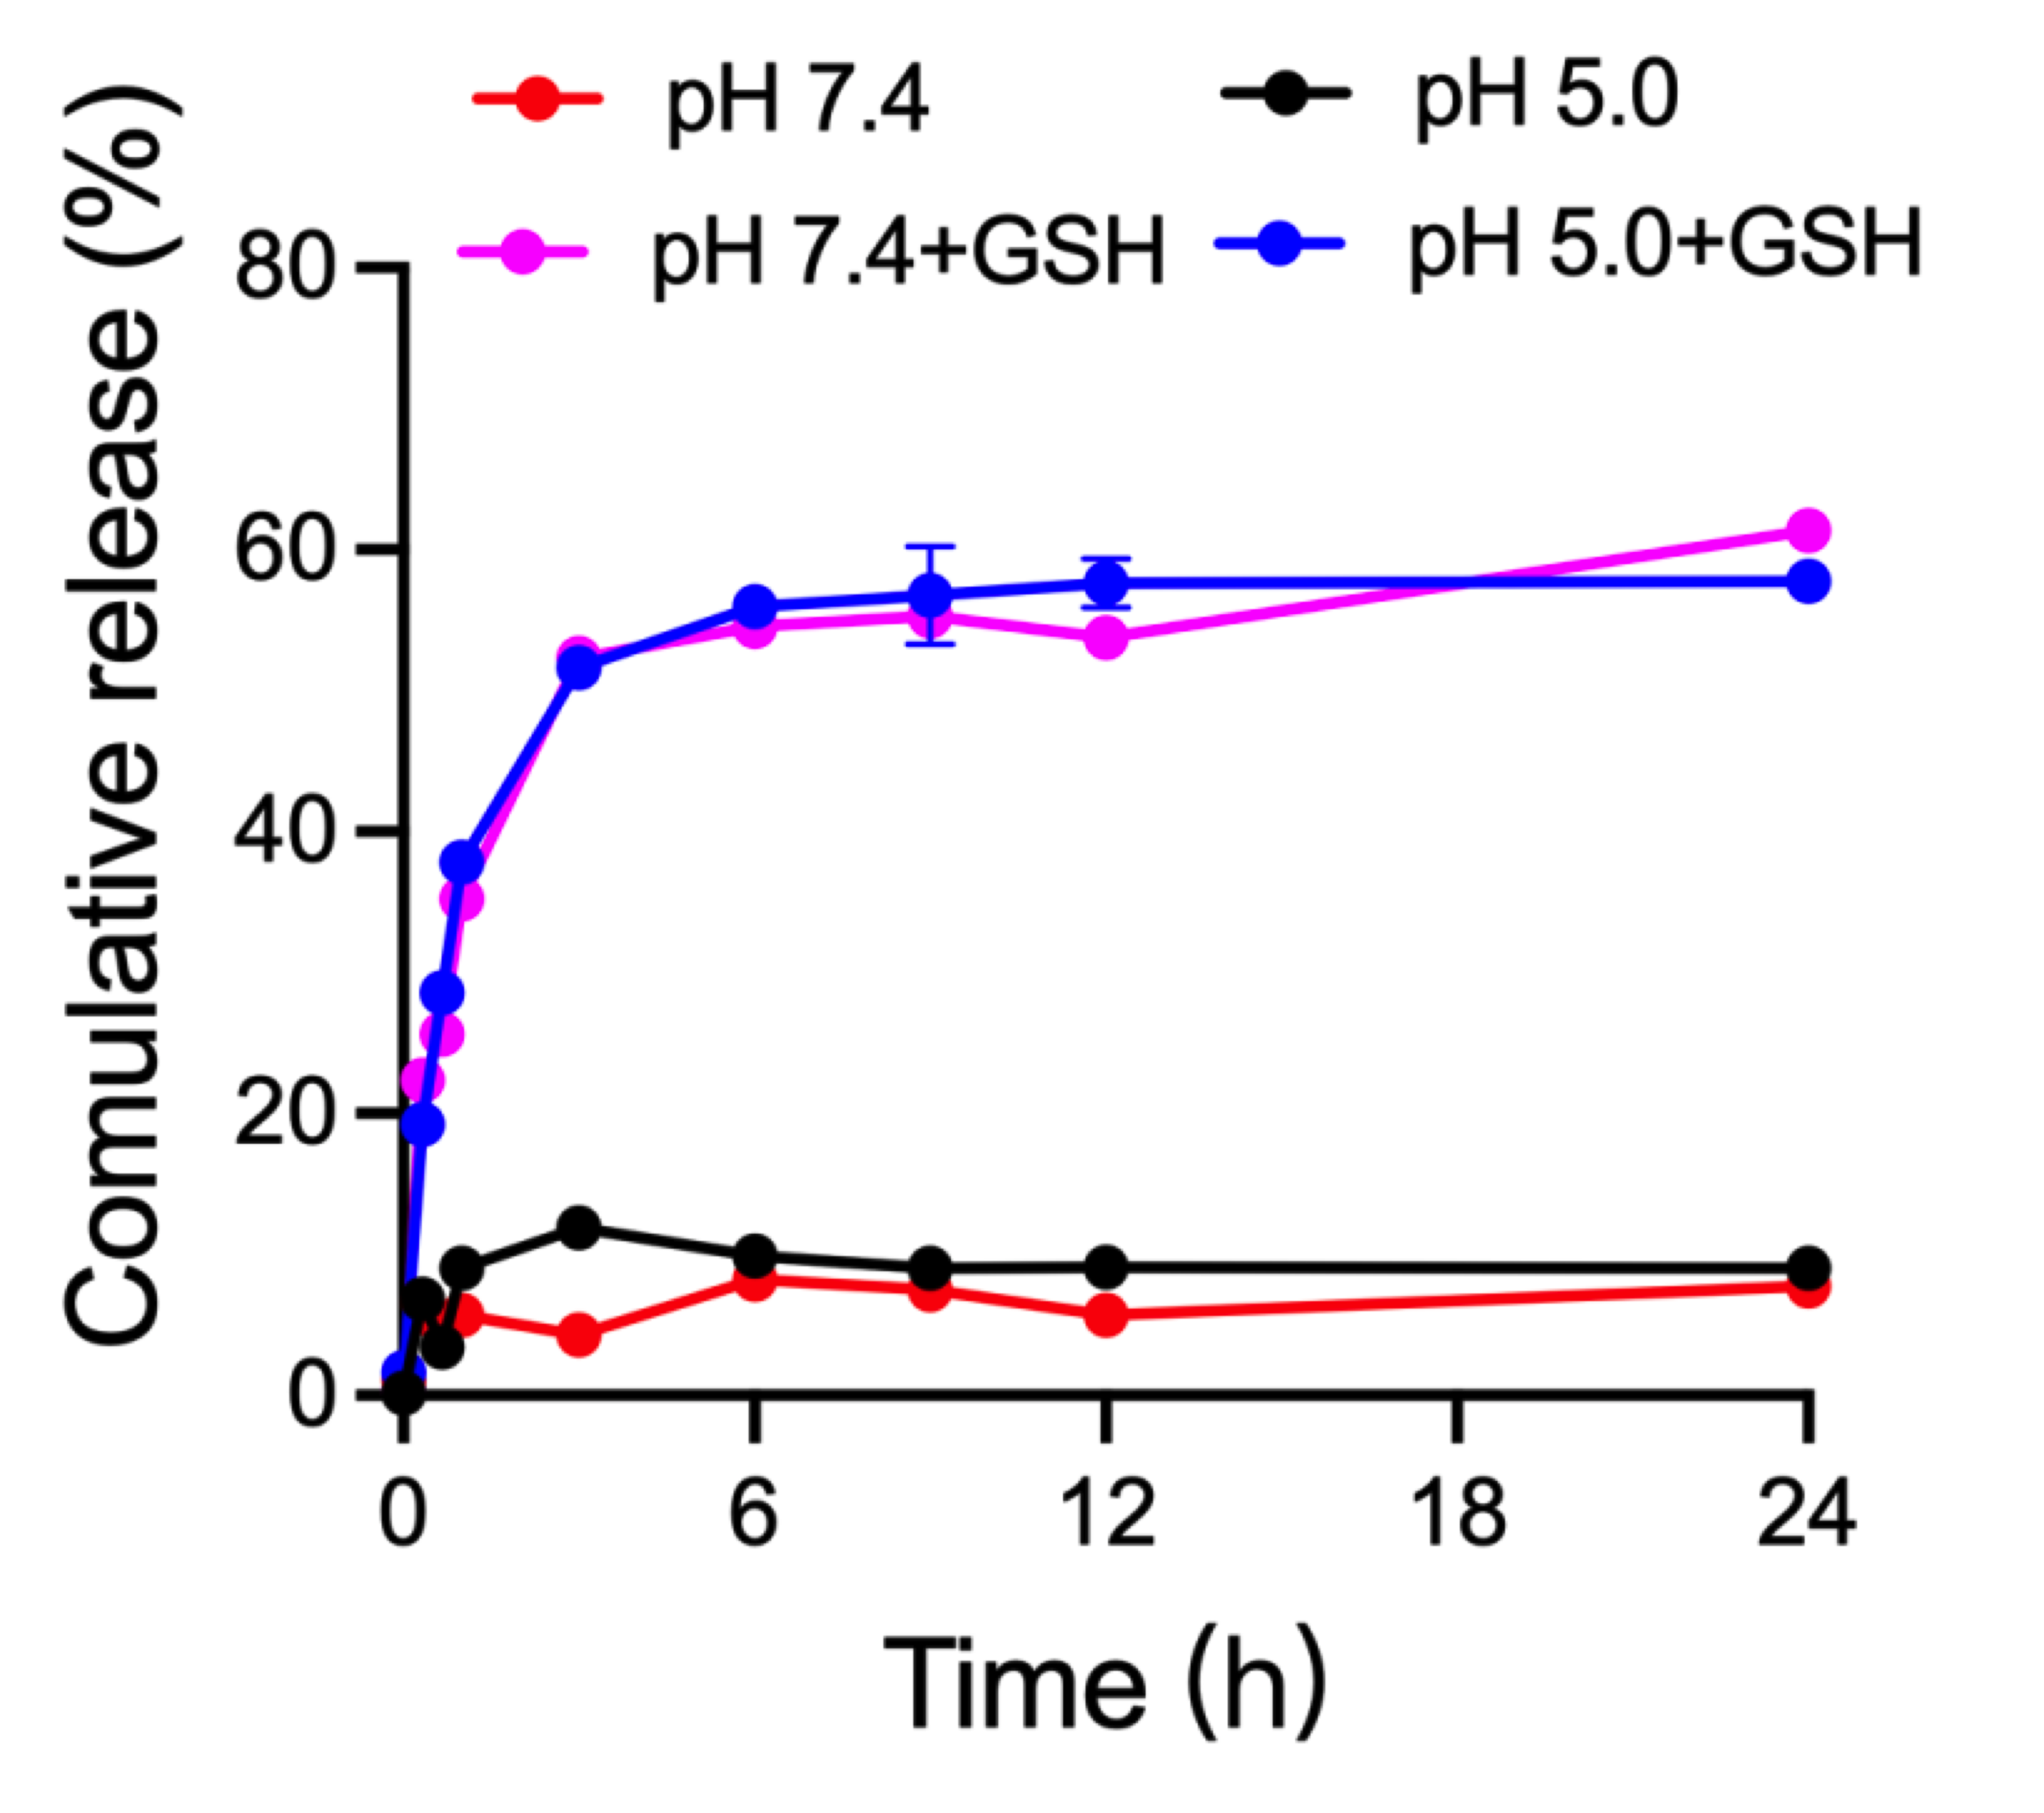


Figure S6 DOX released from DCM@GDY-CuMOF@DOX at pH 5.0, and 7.4, in present of GSH or not.


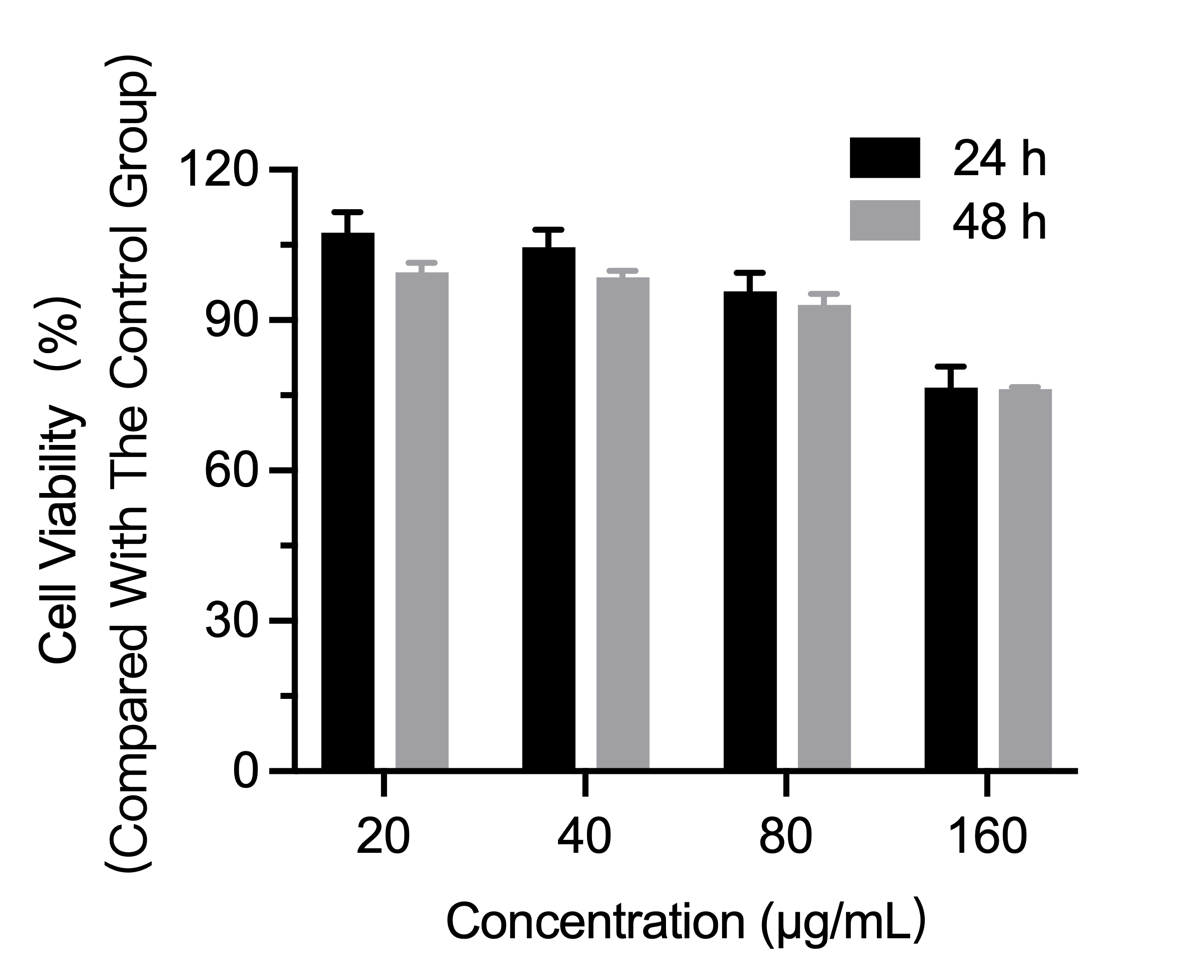


Figure S7 The cell viability of DU145 cells treated with GDY at various concentrations for 24 h and 48 h determined by CCK-8 assay.


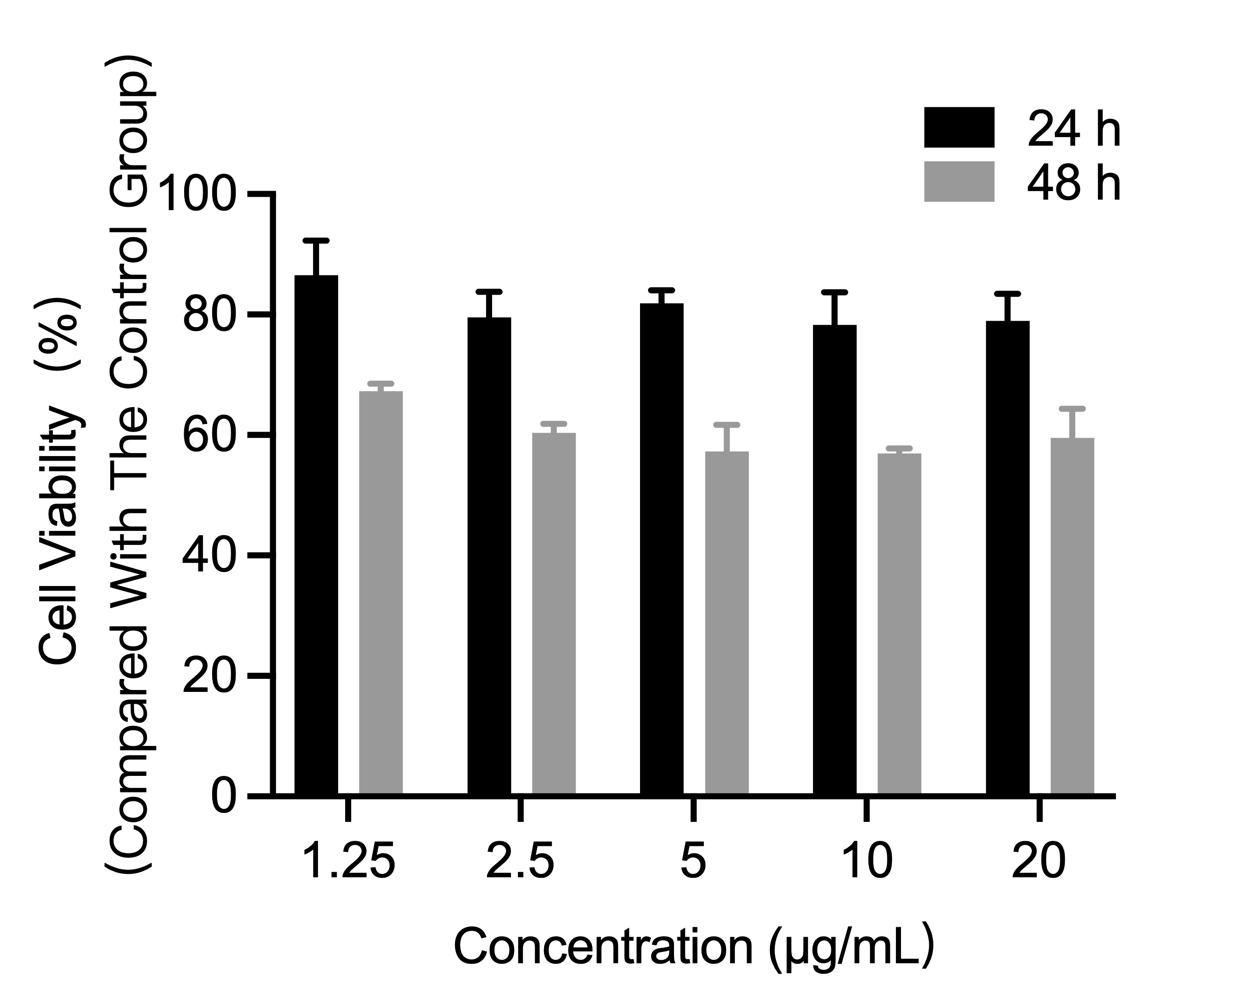


Figure S8 The cell viability of PC3 cells treated with DCM@GDY-CuMOF@DOX at various concentrations for 24 h and 48 h determined by CCK-8 assay.


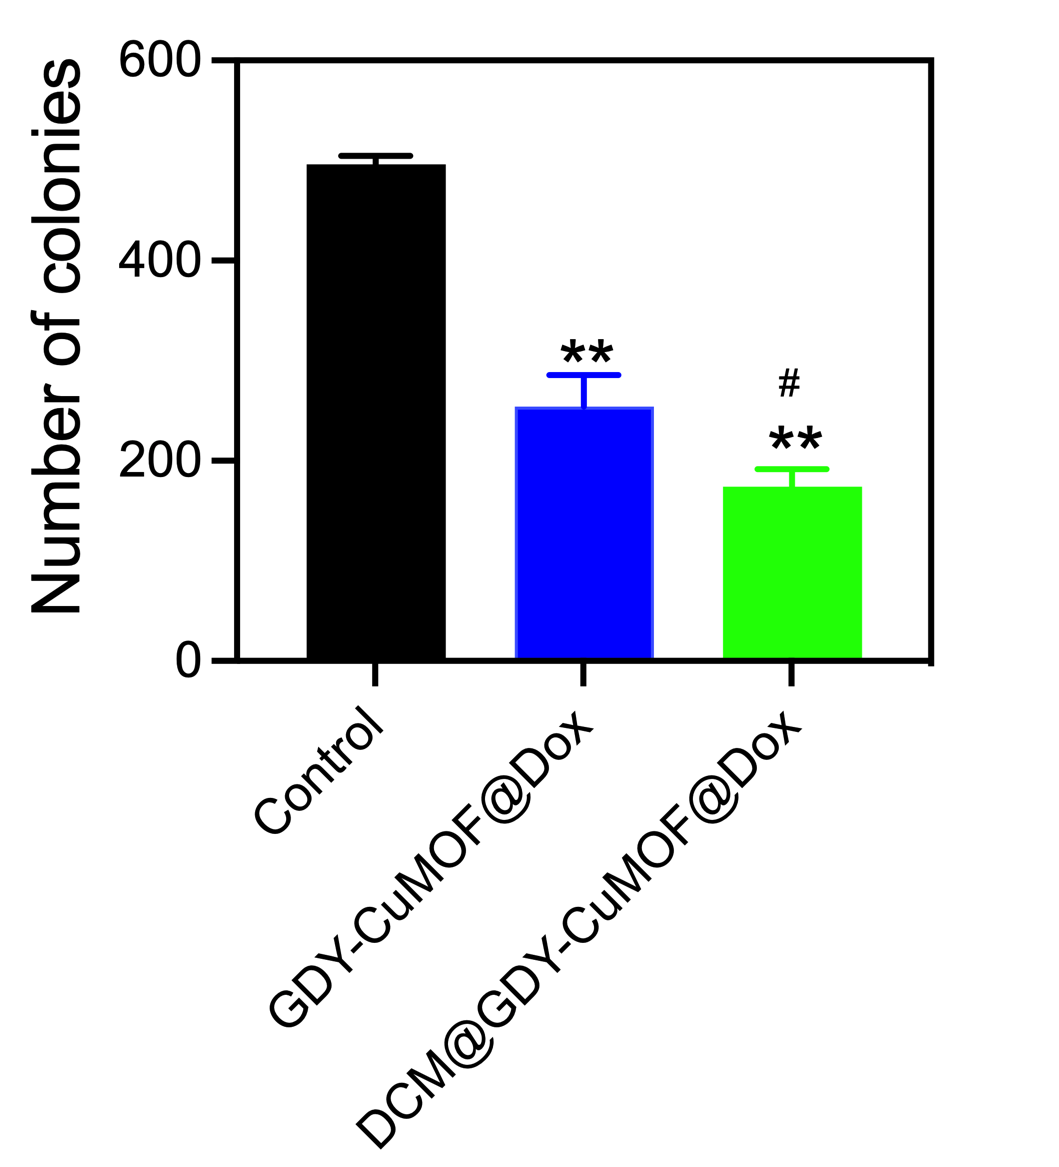


Figure S9 The number of colonies quantified from Figure 4D. The label * and ** indicate p < 0.05 and p < 0.01, respectively, compared with the control group, and the label # indicates p < 0.05 compared with the GDY-CuMOF@DOX group.


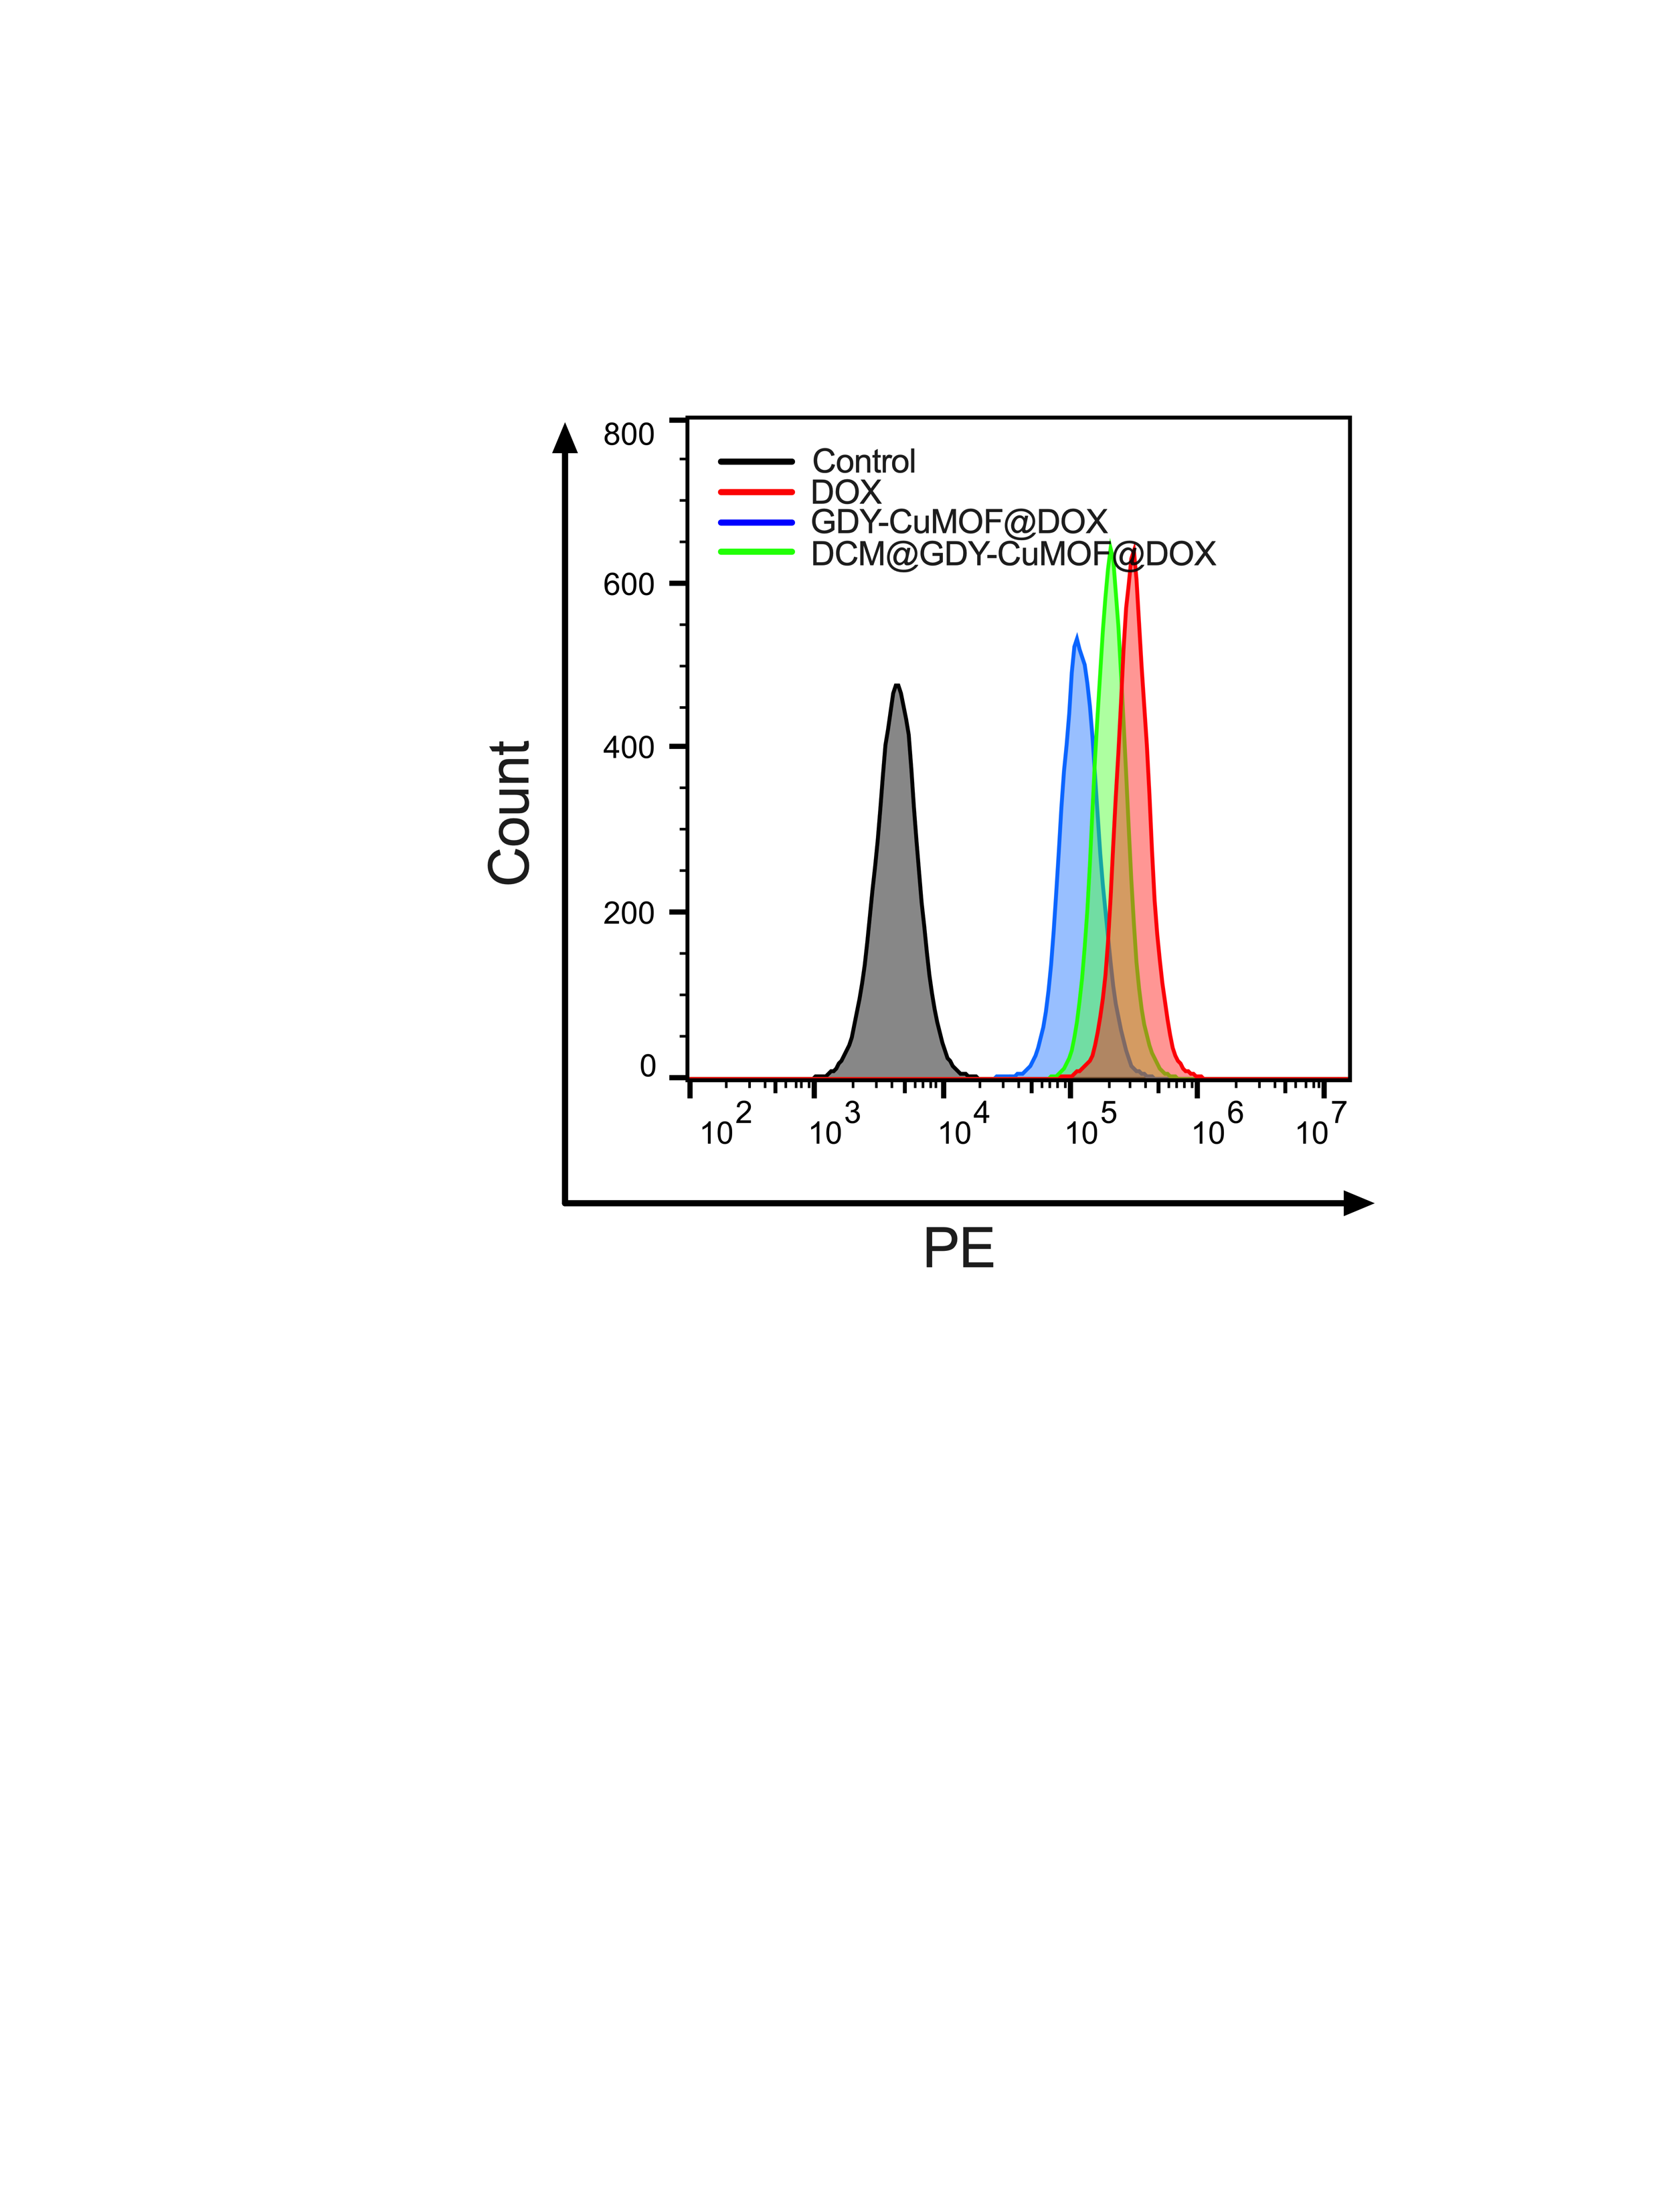


Figure S10 The flow cytometry quantitative analysis of DOX fluorescence in DU145 cells after 8 h treatment with PBS, Free DOX, GDY-CuMOF@DOX, and DCM@GDY-CuMOF@DOX (equivalent DOX concentration of 10 µg/mL) (n=3).


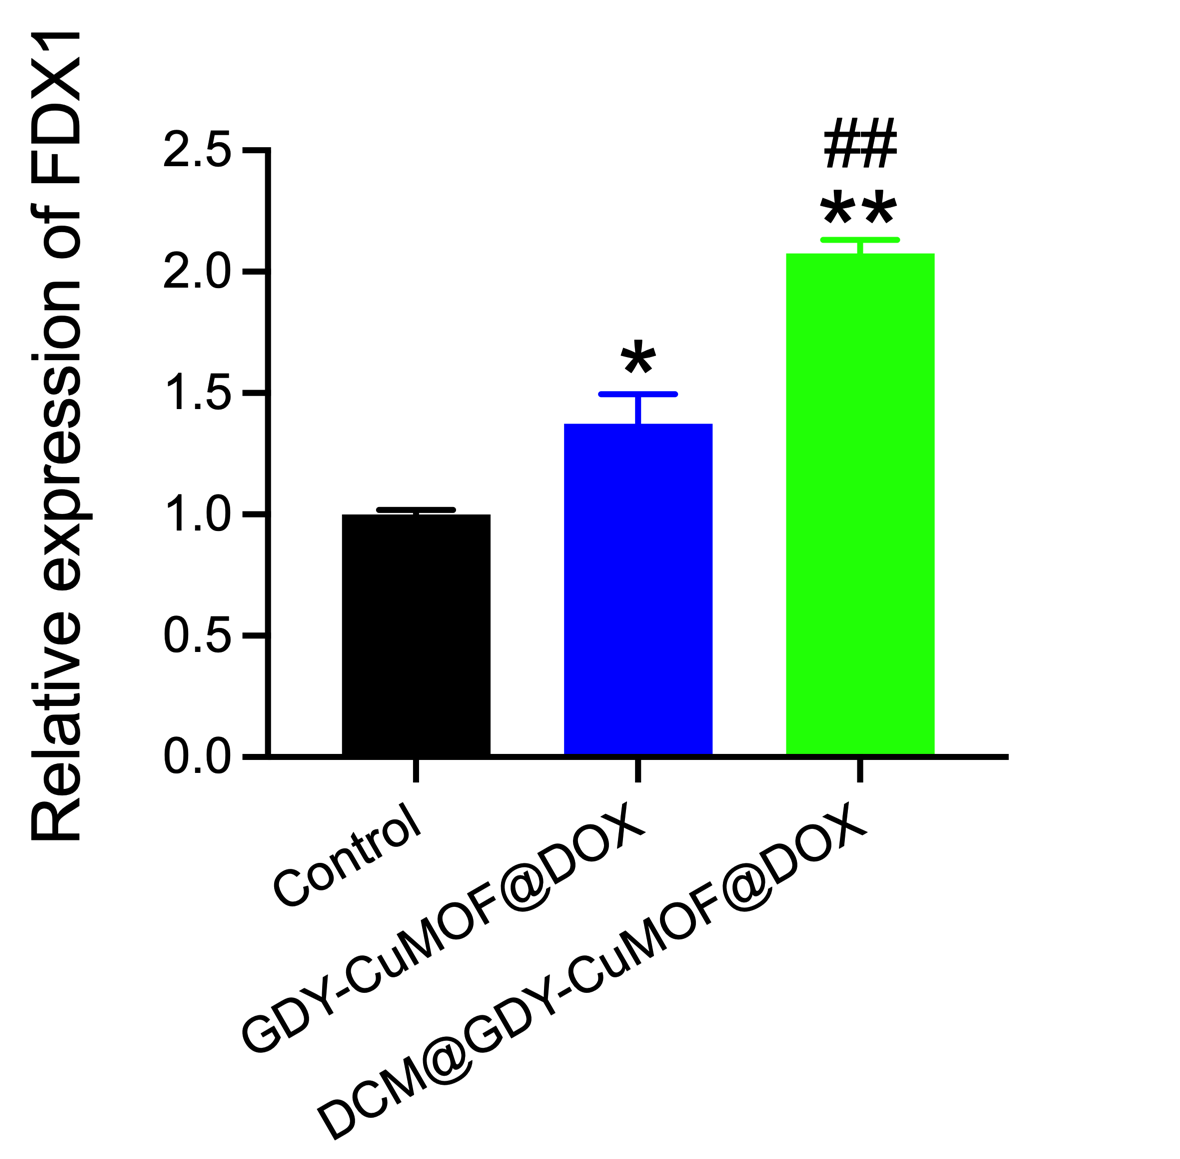


Figure S11 The relative FDX1 expression quantified from Figure 5E. The label * and ** indicate p < 0.05 and p < 0.01, respectively, compared with the control group, and the label ## indicates p < 0.01 compared with the GDY-CuMOF@DOX group.


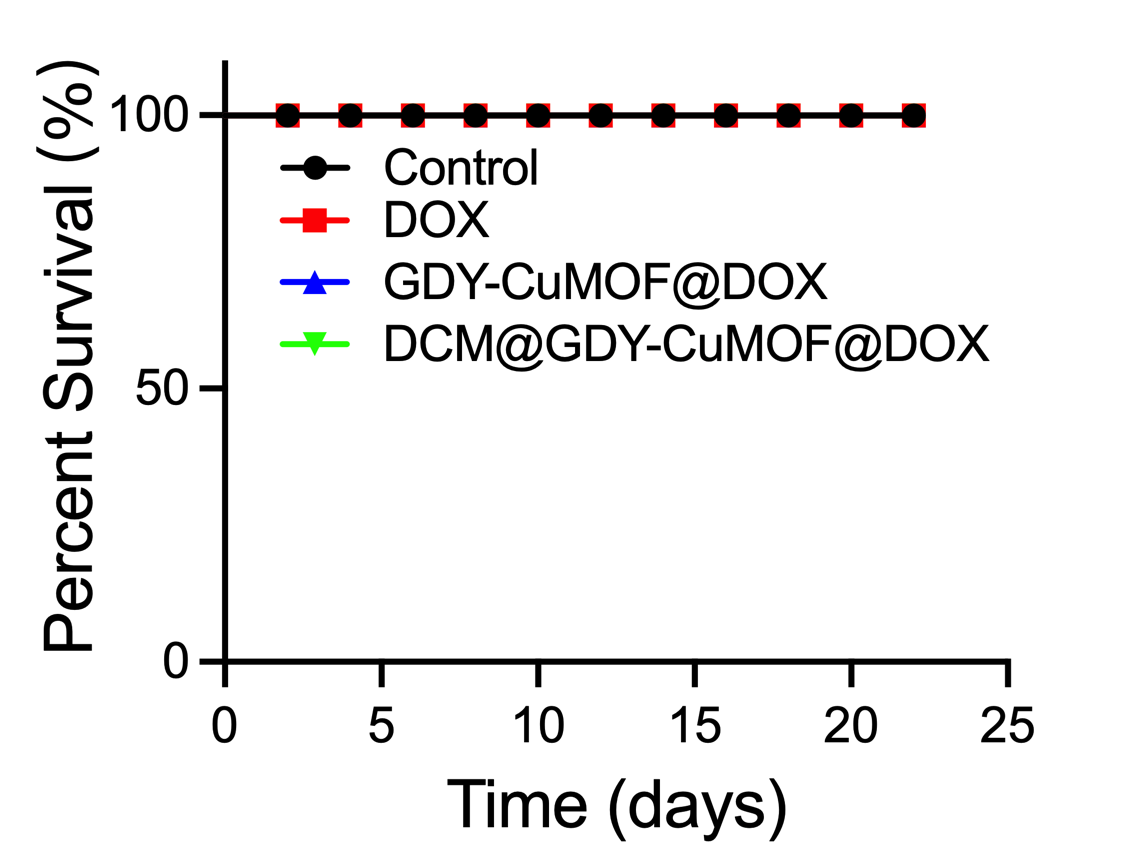


Figure S12 Survival rate of mice in the different treatment groups during the treatment period.


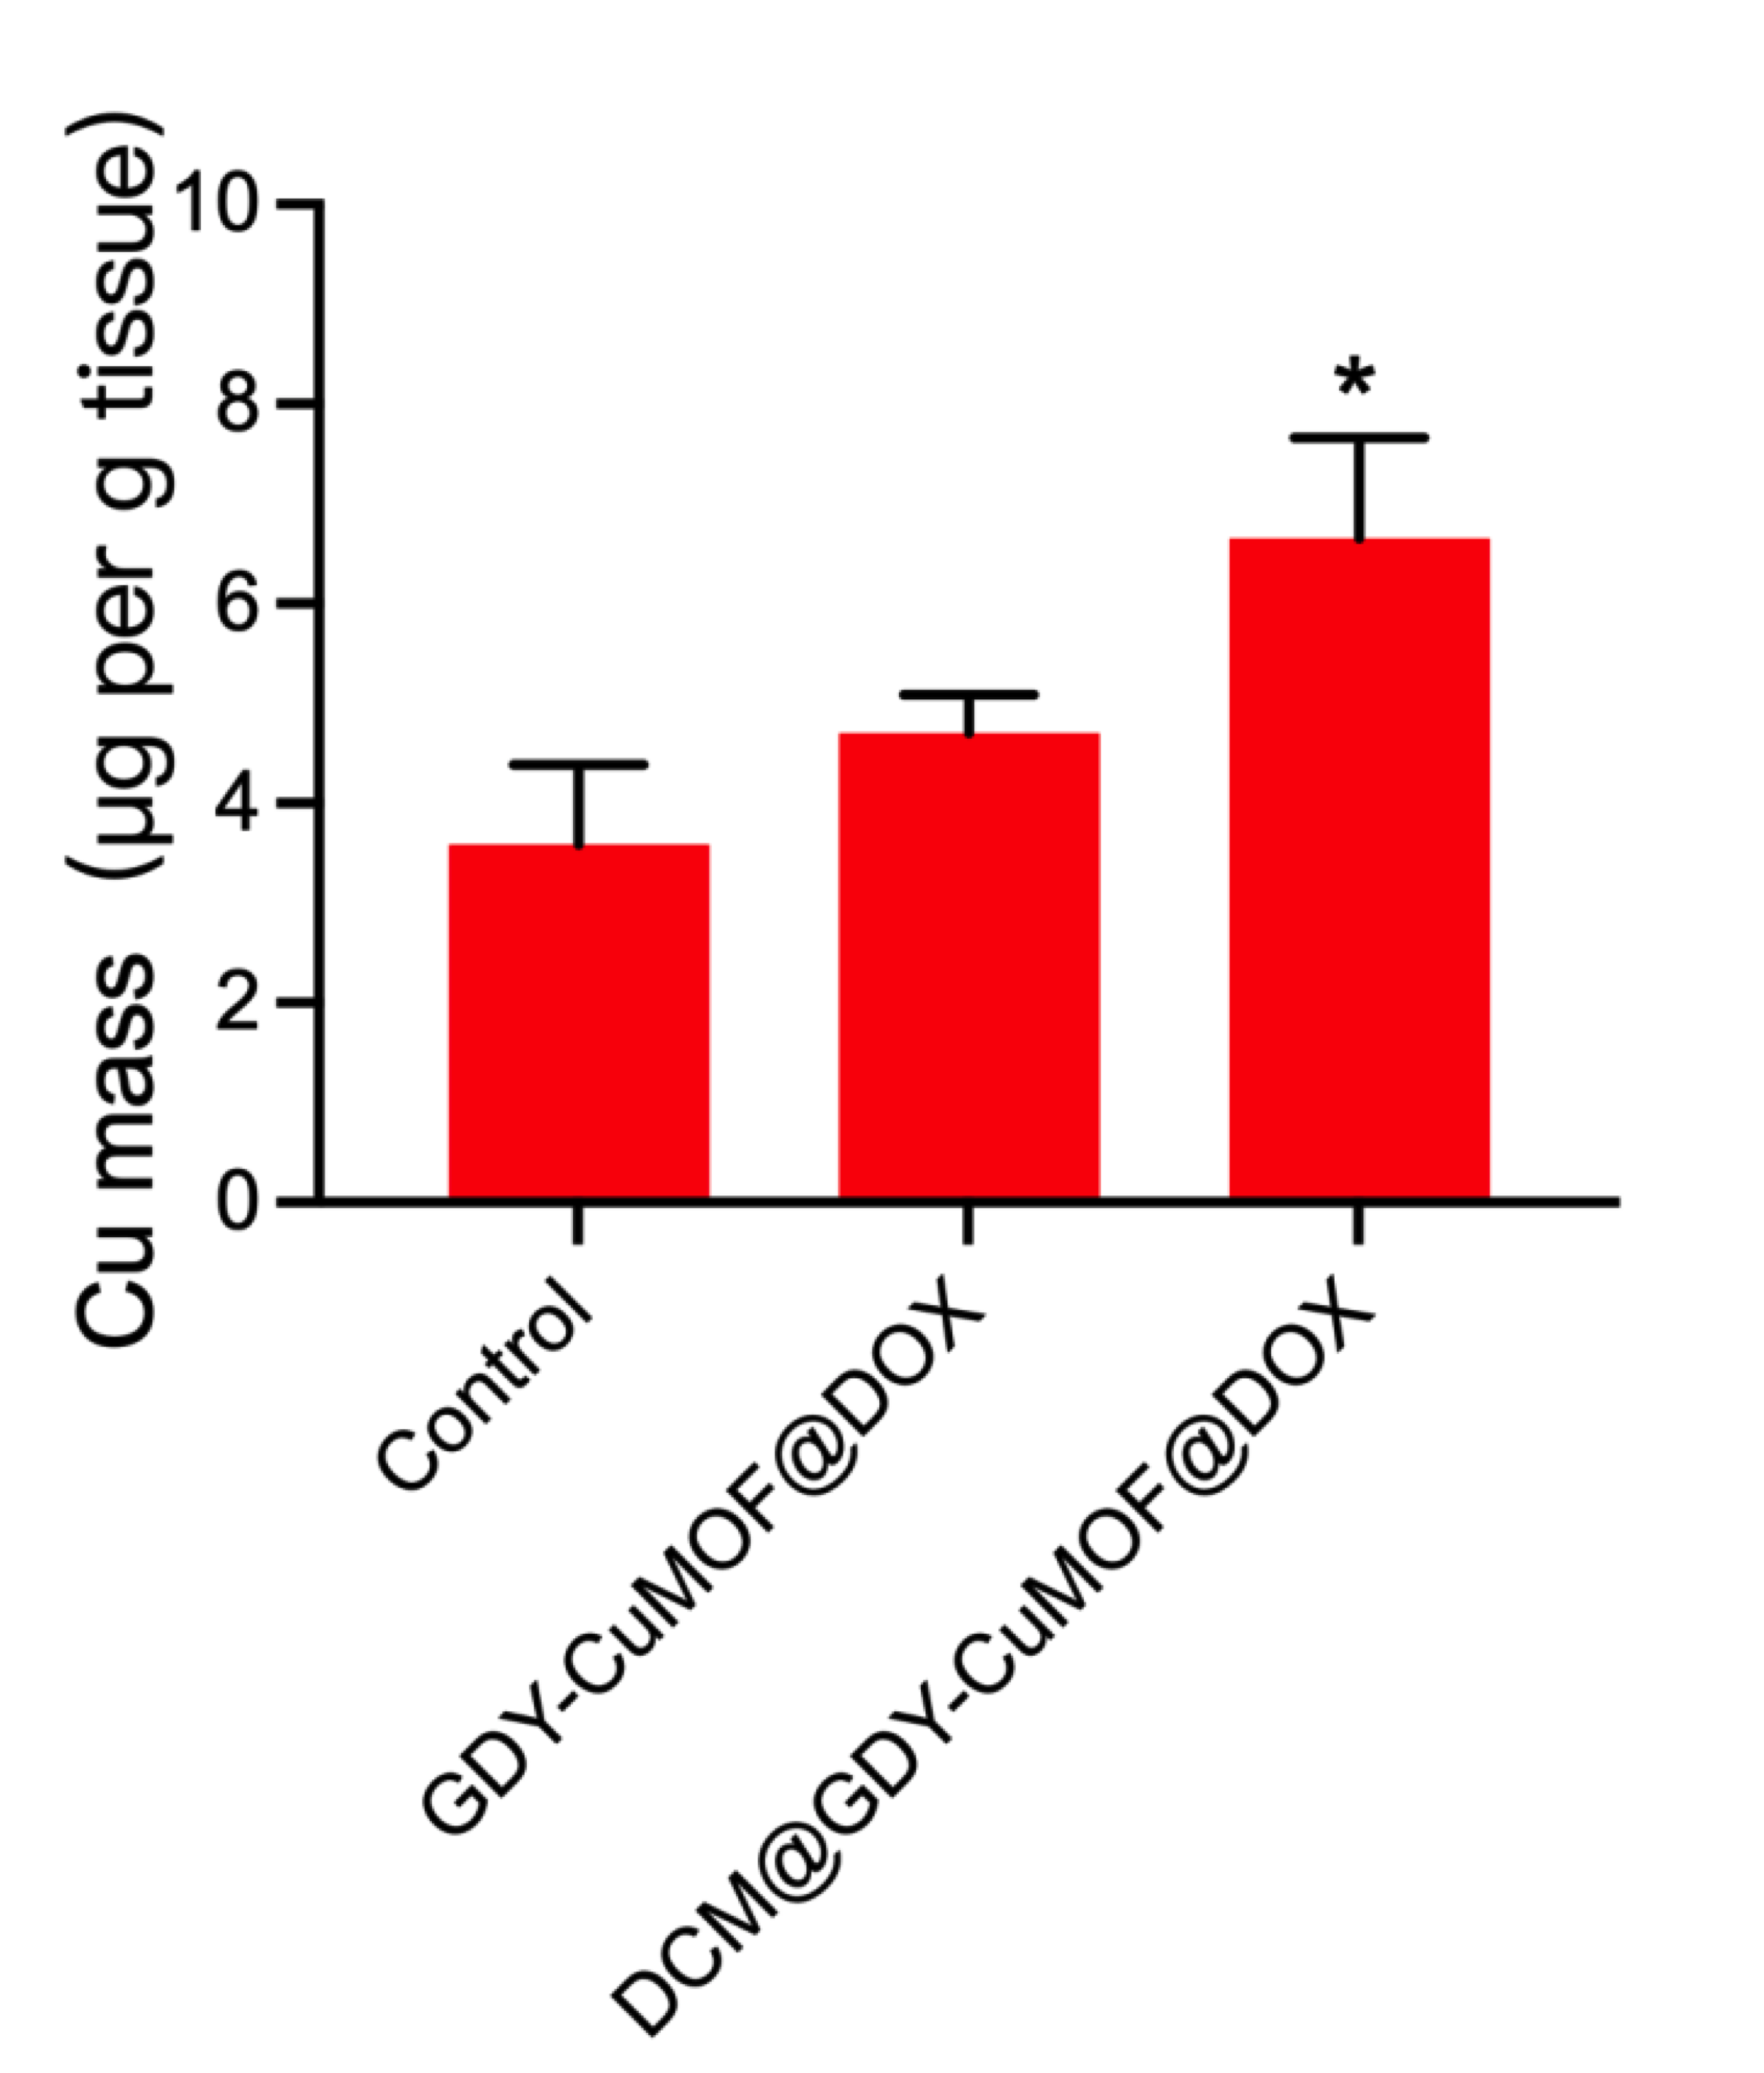


Figure S13 The Cu content in the tumor tissues of various treatment groups detected by ICP-MS. The label * indicates p < 0.05 compared with the control group.


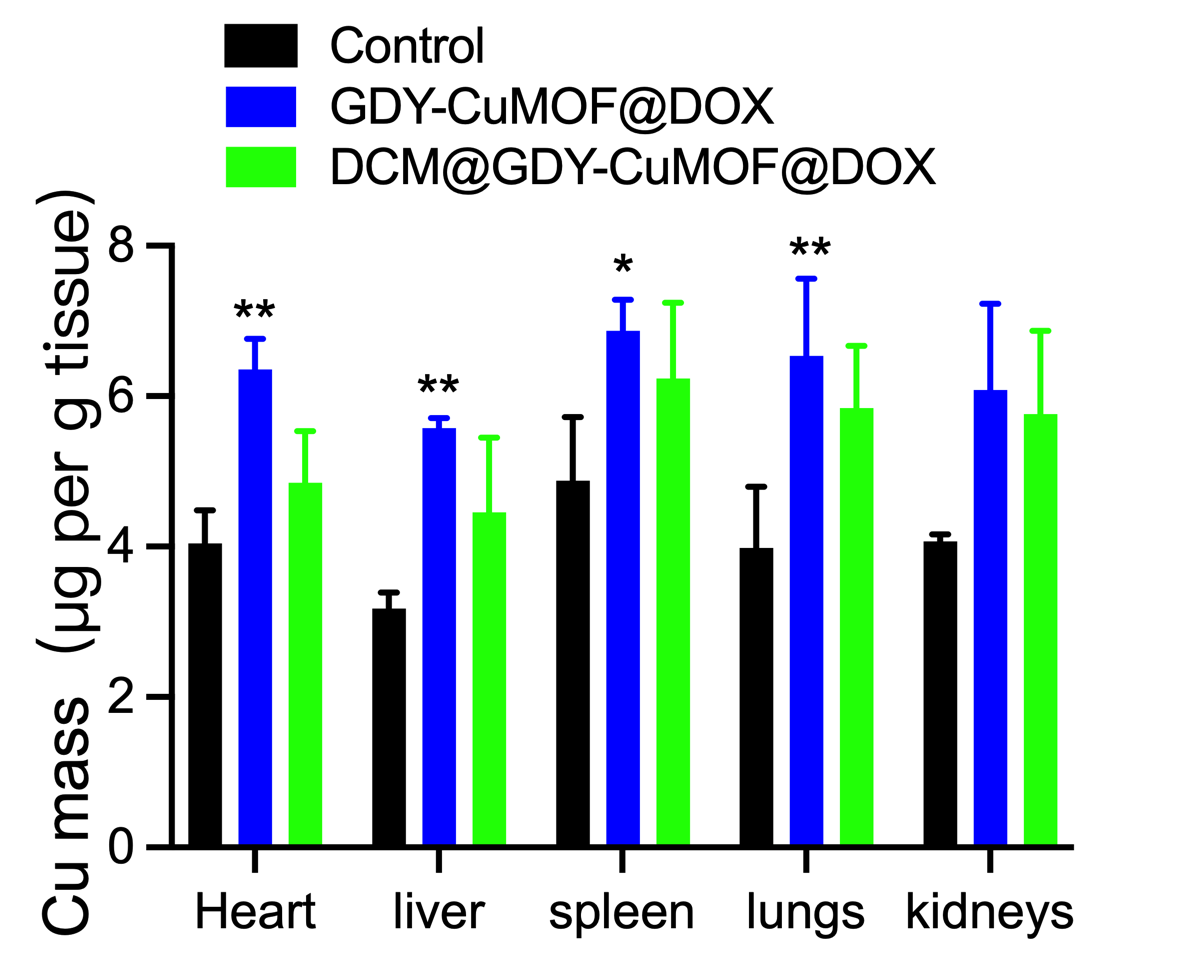


Figure S14 The Cu content in the major organs of various treatment groups detected by ICP-MS. The label * and ** indicate p < 0.05 and p < 0.01, respectively, compared with the control group.


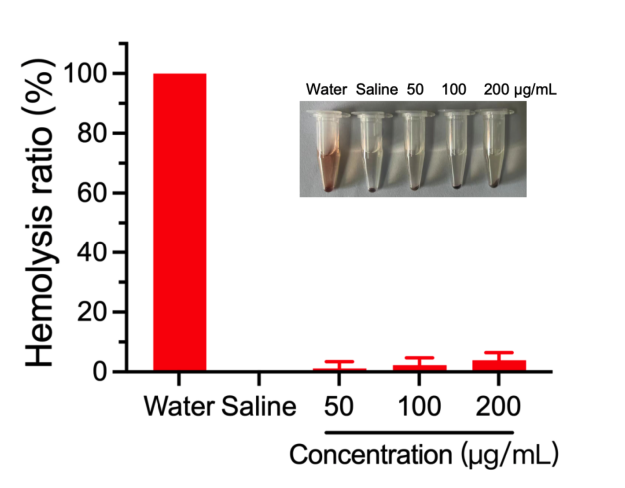


Figure S15 Hemolysis rate of different concentrations of DCM@GDY-CuMOF@DOX.


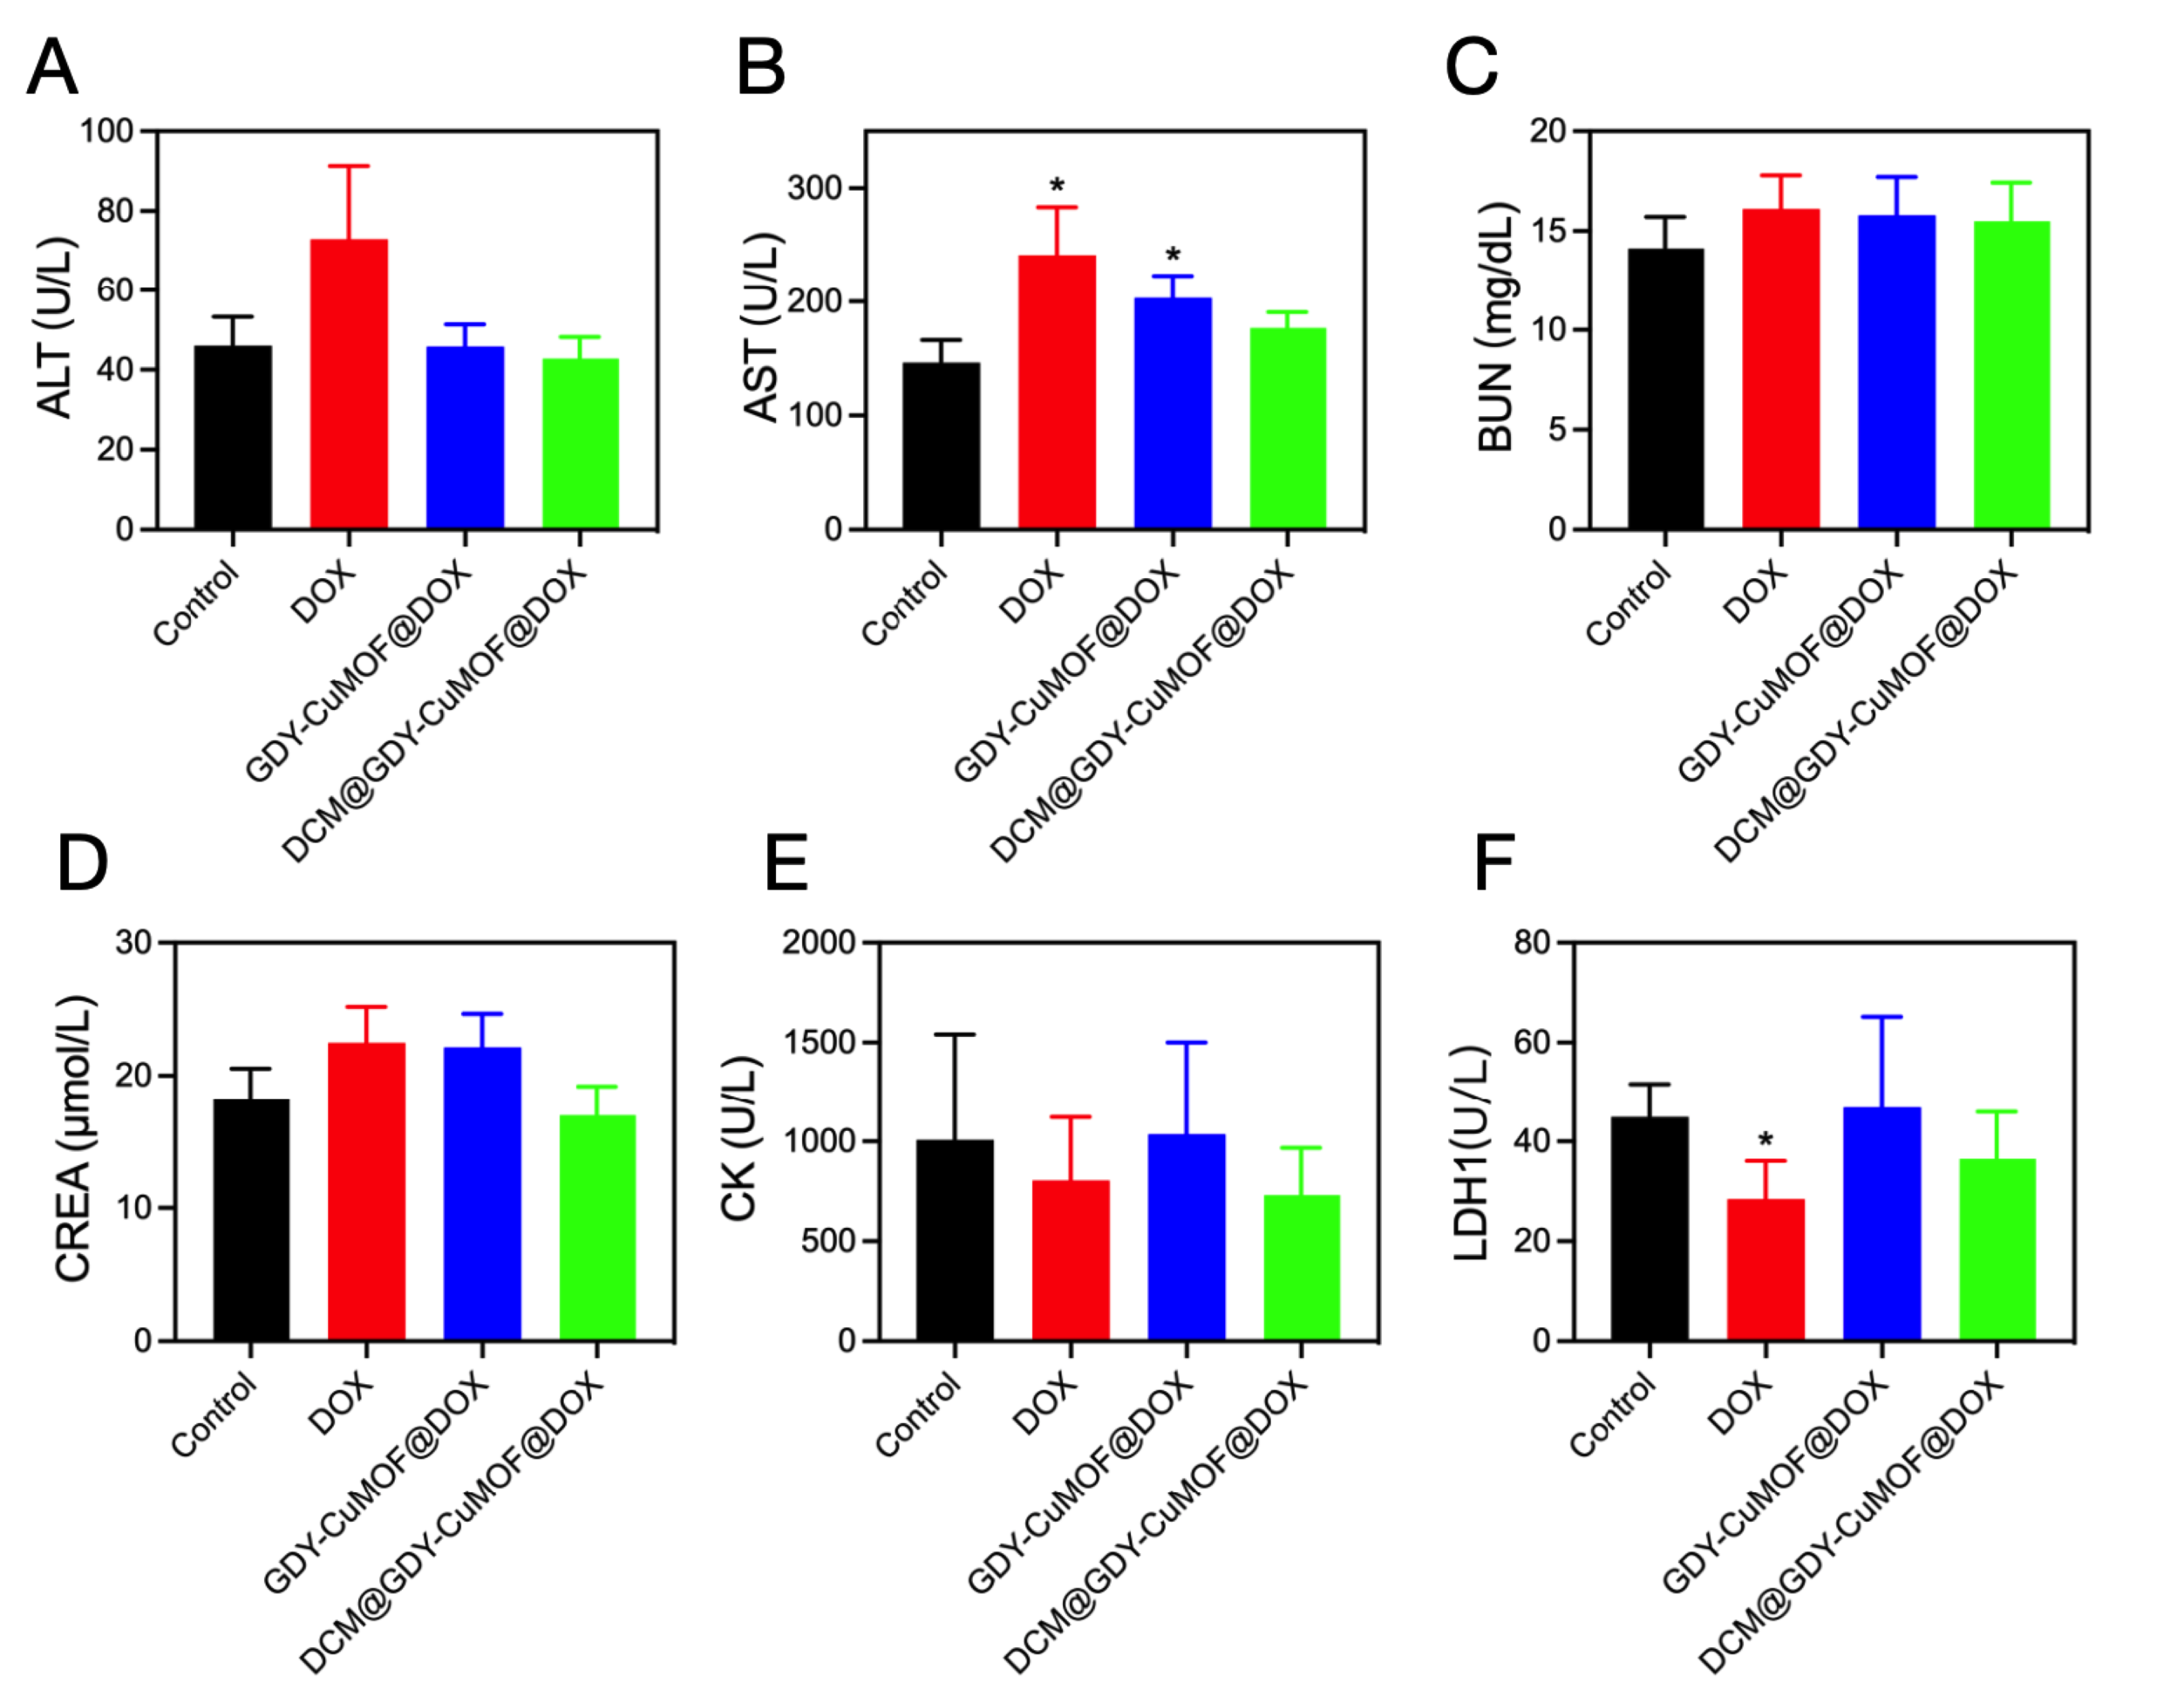


Figure S16 Concentrations of serum biochemical indicators. The levels of (A) ALT, (B) AST, (C) BUN, (D) CREA, (E) CK and (F) LDH1 in the serum of mice from different treatment groups. The label * indicate p < 0.05 compared with the control group, respectively.
